# 1 Integrative analysis of multi-omics reveals 2 gene regulatory networks across brain 3 regions from risk variants to phenotypes of 4 Alzheimer's disease and Covid-19

5 Saniya Khullar<sup>1,2</sup>, Daifeng Wang<sup>1,2,3,\*</sup>

6 <sup>1</sup>Department of Biostatistics and Medical Informatics, University of Wisconsin – Madison,  
7 Madison, WI 53076, USA

8 <sup>2</sup>Waisman Center, University of Wisconsin – Madison, Madison, WI 53705, USA

9 <sup>3</sup>Department of Computer Sciences, University of Wisconsin – Madison, Madison, WI 53706,  
10 USA

11 \*corresponding author: [daifeng.wang@wisc.edu](mailto:daifeng.wang@wisc.edu)

## 12 Abstract

### 13 Background

14 Genome-wide association studies have found many genetic risk variants associated with  
15 Alzheimer's disease (AD). However, how these risk variants affect deeper phenotypes such as  
16 disease progression and immune response remains elusive. Also, our understanding of cellular  
17 and molecular mechanisms from disease risk variants to various phenotypes is still limited. To  
18 address these problems, we performed integrative multi-omics analysis from genotype,  
19 transcriptomics, and epigenomics for revealing gene regulatory mechanisms from disease  
20 variants to AD phenotypes.

### 21 Method

22 First, we cluster gene co-expression networks and identify gene modules for various AD  
23 phenotypes given population gene expression data. Next, we predict the transcription factors  
24 (TFs) that significantly regulate the genes in each module and the AD risk variants (e.g., SNPs)  
25 interrupting the TF binding sites on the regulatory elements. Finally, we construct a full gene  
26 regulatory network linking SNPs, interrupted TFs, and regulatory elements to target genes for  
27 each phenotype. This network thus provides mechanistic insights of gene regulation from  
28 disease risk variants to AD phenotypes.

### 29 Results

30 We applied our analysis to predict the gene regulatory networks in three major AD-relevant  
31 regions: hippocampus, dorsolateral prefrontal cortex (DLPFC), and lateral temporal lobe (LTL).  
32 These region networks provide a comprehensive functional genomic map linking AD SNPs to  
33 TFs and regulatory elements to target genes for various AD phenotypes. Comparative analyses

34 further revealed cross-region-conserved and region-specific regulatory networks. For instance,  
35 AD SNPs rs13404184 and rs61068452 disrupt the bindings of TF SPI1 that regulates AD gene  
36 INPP5D in the hippocampus and lateral temporal lobe. However, SNP rs117863556 interrupts  
37 the bindings of TF REST to regulate GAB2 in the DLPFC only. Furthermore, driven by recent  
38 discoveries between AD and Covid-19, we found that many genes from our networks regulating  
39 Covid-19 pathways are also significantly differentially expressed in severe Covid patients (ICU),  
40 suggesting potential regulatory connections between AD and Covid. Thus, we used the machine  
41 learning models to predict severe Covid and prioritized highly predictive genes as AD-Covid  
42 genes. We also used Decision Curve Analysis to show that our AD-Covid genes outperform  
43 known Covid-19 genes for predicting Covid severity and deciding to send patients to ICU or not.  
44 In short, our results provide a deeper understanding of the interplay among multi-omics, brain  
45 regions, and AD phenotypes, including disease progression and Covid response. Our analysis  
46 is open-source available at <https://github.com/daifengwanglab/ADSNPheno>.

## 47 Introduction

48 Alzheimer's Disease (AD), a neurodegenerative disorder and form of dementia, affects more  
49 than 50 million elders in the world<sup>1</sup>. In particular, late-onset AD (LOAD), which comprises 97%  
50 to 99% of all cases, usually occurs in individuals older than 65<sup>2</sup>. The AD patients experience  
51 memory loss, cognitive decline, and weak executive function, as reflected in their poor Mini-  
52 Mental State Examination (MMSE) results<sup>1</sup>. Furthermore, AD is a complex process. Many  
53 molecular changes from underlying biological mechanisms, such as an accumulation of  
54 amyloid-beta plaques, neurofibrillary tangles (NFTs) within neurons, and neuroinflammation,  
55 have been associated with AD progression phenotypes<sup>3</sup>. However, beyond these associations,  
56 the causal molecular mechanisms of AD, especially for the disease progression, remain elusive.

57  
58 Several AD cohorts have measured the genome-wide gene expression data at the population  
59 level. Also, these data cover different brain regions in AD, such as the Hippocampus,  
60 Dorsolateral Prefrontal Cortex (DLPFC), and Lateral Temporal Lobe (LTL). For instance, the  
61 Hippocampus Cornu Ammonis 1 (CA1) region—which is crucial for autobiographical memory,  
62 mental time travel, and self-awareness—usually has the most significant loss in memory ability,  
63 neurogenesis, volume, and neuronal density in the AD Hippocampus<sup>4</sup>. The LTL contains the  
64 cerebral cortex (responsible for hearing, understanding language, visual processing, and facial  
65 recognition)<sup>5</sup> and is impacted early in AD<sup>6</sup>. The DLPFC is involved in executive functioning  
66 (working memory and selective attention), supports cognitive responses to sensory information<sup>7</sup>,  
67 works with the Hippocampus to help mediate complex cognitive functions<sup>8</sup>, and has plasticity  
68 deficits in AD patients<sup>9</sup>. These datasets thus enable finding genes and transcriptional activities  
69 that associate with AD phenotypes from the populations, providing molecular mechanistic  
70 insights into AD.

71  
72 For example, differential expression analyses for the temporal lobes and frontal lobes found  
73 many key Differentially Expressed genes (DEGs) in AD, including ABCA1 and 2, C1R and C1S,  
74 VGF, REST, GAD1 and 2, SST, and CALB1<sup>10</sup>. Further, gene co-expression network analysis  
75 such as WGCNA has been widely applied to these population data to identify various gene co-

76 expression modules<sup>11</sup>. The genes in the same module show similar expression dynamics across  
77 AD phenotypes (e.g., progression stages), implying that they involve certain shared molecular  
78 mechanisms dysregulated in AD<sup>12</sup>. A previous study using the Hippocampal gene expression  
79 dataset, built gene co-expression networks to find enriched functions for AD and potential target  
80 genes for AD therapy and found 19 co-expression modules and key hub genes for AD, such as  
81 MT1, MT2, MSX1, NOTCH2, ADD3, and RAB31<sup>13</sup>. Other studies with multiscale network  
82 analysis of different AD brain regions identified cell subtype-specific AD drivers, including  
83 GABR2, LRP10, MSN, PLP1, and ATP6V1A<sup>14</sup>. Nevertheless, it is also vital to understand  
84 underlying gene regulatory mechanisms that control those DEGs, co-expression networks, and  
85 gene expression dynamics, which is still unclear.

86  
87 Recent Genome-Wide Association Studies (GWAS) have identified various genetic variants  
88 associated with AD (e.g., explaining the variations of AD phenotypes)<sup>15</sup>. Linking those AD  
89 variants to genes and genomic functions provides a deeper understanding of molecular causes  
90 in AD. For instance, GWAS studies linked AD risk SNPs from 20 loci to AD genes (e.g., AP4E1,  
91 AP4M1, APBB3, BIN1, MS4A4A, MS4A6A, PILRA, RABEP1, SPI1, TP53INP1, and ZYX) by  
92 their proximity to the coding regions<sup>16</sup>. New Proteome-Wide Association Studies (PWAS)  
93 identified 11 additional causal AD genes involved in protein abundance<sup>17</sup>. However, since most  
94 AD-associated variants are located on non-coding DNA regions, identifying potentially causal  
95 AD genes from the variants is still challenging. To address this, functional genomics and gene  
96 regulatory network (GRN) analyses have been widely used to predict the biological functions  
97 and pathways that can be affected by disease variants. For example, gene regulatory network  
98 (GRN) is a crucial mechanism fundamentally controlling gene expression, such that the  
99 transcription factors (TFs) bind to the non-coding regulatory elements (e.g., promoters,  
100 enhancers) to initialize transcription. Non-coding disease SNPs may disrupt the binding sites of  
101 TFs (TFBSs) on the non-coding regulatory elements to cause the abnormal gene expression  
102 that potentially leads to diseases and disease phenotypes (e.g., disease genes). Also, many  
103 tools have been thus developed to discover such TFBS-disrupting SNPs such as SNP2TFBS<sup>18</sup>  
104 and atSNP<sup>19</sup>. Using the TFBS-disrupting SNPs, recent studies have identified many disease  
105 genes, such as for Schizophrenia<sup>20</sup>. However, it is still unclear how these AD-associated  
106 variants cause the gene expression for various AD phenotypes, especially during AD  
107 progression.

108  
109 To address the issues as above, we performed an integrative analysis of multi-omics to reveal  
110 the functional genomics and GRNs from AD variants to AD phenotypes (**Fig. 1, Methods**). In  
111 particular, the input to our analysis includes the population gene expression and phenotype  
112 data, epigenomic data, and AD risk SNPs. First, using a population gene expression dataset in  
113 AD, our analysis builds the gene co-expression network, clusters the network into gene co-  
114 expression modules, and predicts the TFs that co-regulate the modular genes. The genes and  
115 modules are associated with various AD phenotypes via modular expression patterns. Then, we  
116 integrate the chromatin interaction data (e.g., Hi-C) to further link the regulatory elements (e.g.,  
117 promoters, enhancers) to the genes. The binding sites of TFs are also used to link TFs to the  
118 regulatory elements. After this step, we predict a full GRN linking TFs and regulatory elements  
119 to genes and gene modules. Enrichment analysis of each gene module further links the

120 network to functions and pathways. Finally, we look at TFs with binding sites interrupted by AD  
121 SNPs and use them to subset the full network. This subnetwork thus reveals a map linking AD  
122 SNPs to interrupted TFs to regulatory elements to genes and modules to enriched  
123 functions/pathways to AD phenotypes, providing the mechanistic insights of AD variants to  
124 phenotypes. This paper applied this integrative analysis to population gene expression data in  
125 three major regions: Hippocampus, DLPFC, and LTL. We identified brain-specific regulatory  
126 networks for various AD phenotypes, especially on AD progression.

127  
128 In addition, the recent surging SARS-CoV-2 virus (Covid-19) has widely affected elders,  
129 especially with neurodegenerative diseases. For example, studies have found that Covid-19 may  
130 increase a person's risk for Alzheimer's, Parkinson's, and other brain disorders. Elders with AD  
131 are at a significantly higher risk of severe Covid-19 outcomes<sup>21</sup>. Moreover, Covid-19 survivors  
132 show an increased risk of neurological and psychiatric problems, known as Neuro-COVID<sup>22</sup>.  
133 Also, Covid-19 morbidity and mortality have been linked to an overactivated and exaggerated  
134 immune system response. Recent studies have found that the innate immune system may go  
135 awry in AD and maybe a driver of cognitive decline, neuroinflammation, neurodegeneration, and  
136 overall AD pathology<sup>23</sup>. Therefore, both Covid-19 and AD are associated with a dysregulation of  
137 the innate immune system response, and the excessive inflammation and severe immune  
138 response in Covid-19 could advance the progression of neuroinflammatory neurodegenerative  
139 diseases like AD<sup>23</sup>. For instance, several AD risk genes, like APOE4, have been identified with  
140 increased susceptibility to severe Covid-19<sup>24</sup>. Since Covid-19 serves as a strong marker for an  
141 exaggerated and overreactive immune system, elucidating pathways disrupted in Covid-19 and  
142 AD may provide more insights on the role of a misguided immune system in AD onset and  
143 progression. However, underlying gene functions linking the immunological functions from  
144 Covid-19 to AD are unknown. To better understand this, we looked at brain-region gene  
145 regulatory networks from our analysis that target AD genes relating to the immunological  
146 functions and pathways, including Covid-19. Using independent gene expression data for Covid,  
147 we found that many genes in the networks are significantly differentially expressed in severe  
148 Covid patients (ICU), suggesting abnormal expression activities of those genes in Covid-19.  
149 Therefore, we finally trained a machine learning model to predict severe Covid-19 from those  
150 network genes and prioritized the highly predictive genes as a set of AD-COVID marker genes.  
151 This marker set provides a potentially novel map for understanding the functional interplay  
152 between the immune system, Covid-19, and Alzheimer's Disease.

153

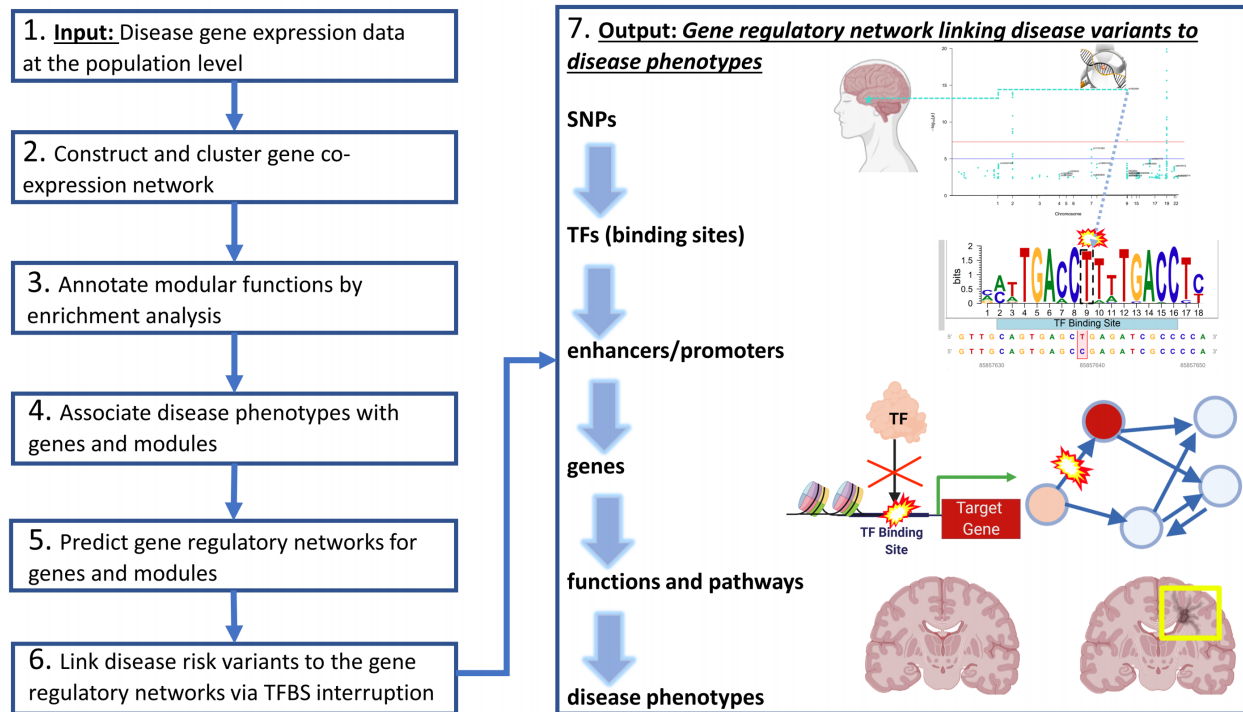

**Fig. 1 – Integrative analyses to predict gene regulatory networks from disease risk variants to phenotypes.** Primarily, this analysis consists of seven major steps as a pipeline. First, it inputs the population gene expression data with phenotypic information (Step 1) and constructs and clusters gene co-expression networks into gene modules (Step 2). Second, it performs enrichment analysis for modules (Step 3) and links genes and modules to various phenotypes from the population (Step 4). Third, it predicts the transcription factors (TFs) and regulatory elements (e.g., enhancers) that regulate genes and co-regulate modular genes as a gene regulatory network (Step 5). Also, it further finds disease risk variants (e.g., GWAS SNPs) that interrupt the binding sites of TFs from the network (Step 6). Finally, we output a full gene regulatory network linking disease variants to interrupted TFs and enhancers to regulated genes and modules to enriched functions and pathways to disease phenotypes (Step 7). The network thus provides a deeper understanding of gene regulatory mechanisms in diseases. As a demo, in this paper, we applied to AD population datasets from different brain regions. We predicted brain-specific gene regulatory networks for various AD phenotypes such as progression stages.

## 154 Materials and Methods

### 155 The pipeline of our integrative analysis for predicting gene regulatory 156 mechanisms from AD risk variants to phenotypes

157 Our analysis can be summarized as a pipeline to predict gene regulatory networks from disease  
158 risk variants to phenotypes (**Fig. 1**). The network for specific phenotypes links disease risk  
159 variants (e.g., GWAS SNPs), non-coding regulatory elements, transcription factors (TFs) to

160 genes and genome functions, providing comprehensive mechanistic insights on gene regulation  
161 in disease phenotypes. Specifically, the pipeline includes the following steps. Here, our analysis  
162 is open-source available at <https://github.com/daifengwanglab/ADSNPheno>.

- 163 • Step 1: Input gene expression data at the population level. The input data includes gene  
164 expression data of individuals and clinical information on AD phenotypes such as Braak  
165 staging and progression.
- 166 • Step 2: Construct and cluster gene co-expression network. The pipeline constructs a gene  
167 co-expression network linking all possible gene pairs from the input data. The network edge  
168 weights are the Pearson correlations of the gene expression profiles across input samples.  
169 The gene co-expression network is further clustered into gene co-expression network  
170 modules. The genes in the same co-expression module are likely involved in similar  
171 functions and co-regulated by specific regulatory mechanisms.
- 172 • Step 3: Annotate modular functions by enrichment analyses. To annotate the functions of  
173 gene co-expression modules, we calculate enriched pathways and functions, including  
174 KEGG pathways, REACTOME pathways, and Gene Ontology (GO) terms of the genes in  
175 each gene co-expression module.
- 176 • Step 4: Associate AD phenotypes with genes and modules. We associate genes and  
177 modules with the phenotypes of input samples, revealing potential driver genes and  
178 modules for the phenotypes.
- 179 • Step 5: Predict gene regulatory networks for genes and modules. We apply multiple  
180 computational methods to predict the gene regulatory networks that link TFs, non-coding  
181 regulatory elements to genes and modules, providing regulatory mechanistic insights on AD  
182 genes and modules.
- 183 • Step 6: Link disease risk variants to the gene regulatory network. Our analysis further finds  
184 disease risk variants that interrupt the binding sites of TFs (TFBSs) in the gene regulatory  
185 networks for identifying functional variants to genes and modules to AD phenotypes.
- 186 • Step 7: Output a gene regulatory network linking disease variants to AD phenotypes.  
187 Ultimately, this network is the output that links AD genetic risk variants, non-coding  
188 regulatory elements, transcription factors (TFs) to genes and genome functions (via  
189 modules) for various phenotypes in the input data.

## 190 Population gene expression data and data processing in Alzheimer's 191 disease

192 We applied this pipelined analysis to post-mortem AD population gene expression datasets for  
193 three major regions that relate to AD: Hippocampal CA1, Lateral Temporal Lobe (LTL), and  
194 Dorsolateral prefrontal cortex (DLPFC). Also, we processed the gene expression datasets as  
195 follows.

196  
197 Hippocampal CA1: The microarray gene expression dataset (GSE1297)<sup>25</sup> was used. The  
198 dataset had total RNA expression values for 22,283 HG-U133 Affymetrix Human Genome U133  
199 Plus 2.0 Microarray Identifier probes for 31 individual postmortem samples. These individual  
200 samples include 9 control samples (no AD), 7 initial stage samples, 8 moderate stage samples,  
201 and 7 severe stage samples. We used GEOquery<sup>26</sup>, hgu133a.db<sup>27</sup>, hgu133acdf<sup>28</sup>, and Affy<sup>29</sup> R

202 packages to download the raw data and perform Robust Multichip Average (RMA)  
203 normalization<sup>30</sup> to account for background and technical variations among these samples. We  
204 mapped those microarray probes genes, averaging values that mapped to the same gene  
205 Entrez ID, removing probes that did not map to any known genes. Also, we transformed the  
206 resulting gene expression data by  $\log_2(x + 1)$  transformation and standardized that by R's  
207 `scale()` function. The finalized gene expression dataset in hippocampal CA1 has 13,073 unique  
208 genes for these 31 samples.

209  
210 Lateral Temporal Lobe (LTL): The normalized bulk RNA-Seq dataset (GSE159699)<sup>6</sup> was used.  
211 This dataset had total RNA expression values for 27,130 different genes for 30 individual  
212 postmortem samples. This group of individual samples includes 8 young samples (ages 60 and  
213 below), 10 old samples, and 12 old samples with advanced AD. After our data pre-processing  
214 steps, we had 25,292 genes, and we applied a  $\log_2(x+1)$  transformation to this gene expression  
215 data. The finalized gene expression dataset in Lateral Temporal Lobe has 25,292 unique genes  
216 for these 30 samples.

217  
218 Dorsolateral prefrontal cortex (DLPFC): FPKM data from the ROSMAP Study, available on  
219 synapse.org (ID: syn3219045), was used<sup>31</sup>. Removing lowly expressed protein-coding genes  
220 (those with counts low for over 90% of the samples and 0 variance) shrunk the list of DLPFC  
221 genes down to 26,014 genes. In this dataset, there are 638 out of 640 individual RNA-Seq  
222 samples with mapped phenotype information. We also applied a  $\log_2(x+1)$  transformation to  
223 this gene expression data and then standardized it with the R function, `scale()`. The finalized  
224 gene expression dataset in DLPFC has 26,014 genes for these 638 samples.

225  
226 Finally, there are 32,648 total unique protein-coding genes and 12,183 shared genes across  
227 these 3 brain regions. **Fig. S1** has a Venn-Diagram breakdown of gene counts across the  
228 different regions. 12,591 genes are found in the Hippocampus Ca1 and LTL, 12,444 genes are  
229 found in the Hippocampus Ca1 and DLPFC, and 18,882 genes are found in the LTL and  
230 DLPFC.

## 231 Regulatory elements and Chromatin interactions in the human brain 232 regions

233 Epigenomic data has identified a variety of regulatory elements such as enhancers and  
234 promoters. Also, chromatin interaction data (e.g., Hi-C) have further revealed interacting  
235 enhancers and gene promoters. Thus, we integrated recent published epigenomic and  
236 chromatin interaction data for three brain regions to link enhancers to genes (via promoters).  
237 For Hippocampal Ca1, we obtained its enhancers and promoters from Brain Open Chromatin  
238 Atlas (BOCA)<sup>32</sup> and promoter-based interactions from GSE86189<sup>33</sup>. To identify promoters in  
239 LTL and DLPFC, we used R package, `TxDb.Hsapiens.UCSC.hg19.knownGene`<sup>34</sup>, to retrieve  
240 promoter start and stop positions of genes, using a promoter length of 5,000 base pairs.  
241 Besides, we used the H3K27ac data from GSE130746<sup>6</sup> to find the enhancers in LTL. This  
242 dataset contains information on the target gene, distance that the H3K27ac mark is from the  
243 target gene's Transcription Start Site (TSS), and enhancer start and end positions. The  
244 enhancers in LTL that we used were at least 1,000 bases away from the TSS. Moreover, for

245 DLPFC, we used the enhancers and interacting enhancer-promoter pairs in DLPFC from  
246 PsychENCODE<sup>35</sup>.

## 247 Gene co-expression network analysis

248 We applied WGCNA<sup>36</sup> to population gene expression data to construct and cluster gene co-  
249 expression networks into gene co-expression modules (minimum module size = 30 genes).  
250 Also, we further used a K-Means clustering<sup>37</sup> step to improve the module assignments, i.e.,  
251 assigning unclustered genes (grey modules from WGCNA) into the modules. This step uses the  
252 modular eigengenes from WGCNA as initial centroids for the K-Means to build modules with a  
253 minimum size of 30 genes. In total, we obtained 29 gene co-expression modules for 13,073  
254 genes for the hippocampal data, 56 modules for the 25,292 genes for the LTL, and 35 modules  
255 for 26,014 genes for the DLPFC. Besides, we calculated the module membership (MM) of  
256 genes for each module, which is the Pearson Correlation (r) of each gene with the modular  
257 eigengene. The MM values illustrate how similar the genes in the dataset are to a given module.  
258 Genes can have statistically significant MM values (p-value < 0.05) for multiple modules.

## 259 Enrichment analyses of gene co-expression modules

260 Co-expressed genes in the same module are highly likely involved in similar functions and  
261 pathways. The enrichment analysis has thus been widely used to identify such functions and  
262 pathways in a gene module. Enrichment p-values were adjusted using the Benjamini-Hochberg  
263 (B-H) correction. Given a group of genes (e.g., from a module) for each brain region, we used  
264 multiple tools and hundreds of data sources for enrichment analyses (please see **Table S1**).  
265 We used the highest enrichment  $-\log_{10}(\text{adjusted p-value})$  scores from any source for each gene  
266 module and respective enrichment in a brain region. Then, for each enrichment for a phenotype  
267 in a region, we averaged the non-zero enrichment values for the gene modules that are  
268 statistically significantly positively correlated for that phenotype.

## 269 Association of genes and modules with AD phenotypes

270 We further associated genes and modules with these key AD developmental phenotypes: AD  
271 Stages and Progression (Moderate Stage, Severe Stage, and AD Progression),  
272 Healthy/Resilient (Control Stage or other resilient individuals with better cognitive abilities  
273 despite AD pathology), APOE genotype (APOE E4/E4 is a huge AD risk factor<sup>38</sup>), Braak  
274 Staging, neuritic plaque accumulation (measured by CERAD Score), and cognitive impairment  
275 level (based on the MMSE Score). We associated the gene co-expression modules with all  
276 possible AD phenotypes from the input data, by computing the Pearson Correlations of each  
277 modular eigengene to each phenotype. The eigengenes of modules by WGCNA are the first  
278 principal components of modular gene expression. A modular eigengene is a vector with its  
279 elements representing the expression levels of input samples and represents the most likely  
280 gene expression patterns of modular genes. Second, based on the modular eigengenes, we  
281 used the functions of `moduleTraitCor()` and `moduleTraitPvalue()` in WGCNA to find significantly  
282 associated phenotypes to the modules. Statistically significant module-phenotype associations  
283 for analysis have a p-value less than 0.05 and a positive correlation. Also, we used the gene



284 co-expression networks to examine the relationship between the genes and AD phenotypes and  
285 identify potential driver (hub) genes for the modules (based on the degree of connectivity for  
286 each gene in each module).

## 287 Prediction of gene regulatory networks

288 Gene Regulatory Networks (GRNs), a key molecular mechanism, fundamentally control gene  
289 expression. Also, co-expressed genes are likely co-regulated by similar gene regulatory  
290 networks. Thus, our analysis integrates multiple methods to predict the GRNs from gene  
291 expression data and co-expression modules. This study predicted gene regulatory networks in  
292 three brain regions that link transcription factors (TFs), Regulatory Elements (REs), and target  
293 genes/modules. First, we identified REs including enhancers and promoters that potentially  
294 interact using recent chromatin interaction data (Hi-C) and the scGRNom pipeline<sup>39</sup>. Second,  
295 we inferred the transcription factor binding sites (TFBSs) based on consensus binding site  
296 sequences on the interacting enhancers and promoters by TFBSTools<sup>40</sup> and motifmatchr<sup>41</sup>. This  
297 step generates a reference network linking TFs to regulatory elements (by TFBSs) to genes (by  
298 interactions). Third, using gene expression data for a given brain region, we predicted all  
299 possible TF-target gene (TG) pairs (or TF-modules) that have strong expression relationships  
300 by several widely used tools and databases: RTN<sup>42</sup>, TReNA Ensemble Solver<sup>43</sup>, Genie3<sup>44</sup>, (and  
301 TF-gene-module pairs by RTN) as below. Finally, this step maps these TF-TG pairs to the  
302 reference network. It outputs a full gene regulatory network (GRN) for the region that links TFs,  
303 non-coding regulatory elements to target genes and modules.

304  
305 We combined a recent list of TFs<sup>45</sup> with JASPAR's list<sup>46</sup> to generate a final list of candidate TFs  
306 for inferring TF-TG pairs with strong expression relationships. We used this final TF list to find  
307 the candidate TFs for each brain region (based on the respective gene expression data). Also,  
308 TReNA Ensemble Solver with the default parameters (geneCutoff of 0.1 and ensemble of these  
309 solvers: LassoSolver, RidgeSolver, RandomForestSolver, LassoPVSolver, PearsonSolver, and  
310 SpearmanSolver) was used to construct the transcriptional regulatory network that link TFs to  
311 target genes (TGs). Besides, we used GENIE3 to predict additional GRNs via Random Forest  
312 regression, predicting each gene's expression pattern from the expression patterns of all TFs  
313 (TF-TG pairs with weights greater than 0.0025 were retained). In addition, we used RTN to  
314 predict TFs to TGs by calculating the Mutual Information between the TFs and all genes. In  
315 particular, the permutation analysis with 1,000 permutations was applied bootstrapping and the  
316 ARACNe algorithm<sup>47</sup> was used to select most meaningful network edges. Finally, the TF-TG  
317 pairs found in at least 2 of the above 3 sources were combined to map to the reference network.  
318 For the DLPFC, we instead used the published PsychENCODE GRN (Elastic Net regression  
319 weight of 0.1 as a cutoff) filtered for genes found in the DLPFC gene expression data<sup>48</sup>.

320  
321 In addition to predicting TFs for individual genes, we also inferred TFs significantly co-regulating  
322 genes in a module in the Hippocampus and LTL. In particular, we performed the Master  
323 Regulatory Analysis (MRA) on the RTN-inferred network by RTN package<sup>42</sup>. For each gene  
324 module, MRA performed enrichment analysis using the inferred GRN, the phenotype (Module  
325 Membership correlation of all genes to that module), and hits (genes assigned to that module).

326 It applied the hypergeometric test for overlaps between TFs and the genes (using gene  
327 expression data) and found the statistically significant TFs for each module.

## 328 Linking GWAS SNPs for AD to gene regulatory elements

329 GWAS studies have identified a wide variety of genetic risk variants associated with diseases.  
330 However, most disease risk variants lie on non-coding regions, hindering finding disease genes  
331 and understanding downstream disease functions. To this end, we used gene regulatory  
332 networks as described above to link AD SNPs to the regulatory elements in the networks via  
333 interrupted TFBSs. In particular, we looked at 97,058 GWAS SNPs significantly associated with  
334 AD (i.e., AD risk SNPs with  $p < 0.005$ )<sup>15</sup>. We overlapped those AD risk SNPs with the regulatory  
335 elements such as enhancers and promoters in the gene regulatory networks from Step 5. Then,  
336 we identified the variants that interrupt the TFBSs on the regulatory elements by motifbreakR<sup>49</sup>  
337 (using ENCODE-motif, FactorBook, HOCOMOCO, and HOMER data sources and default  
338 methodology, with a threshold of 0.001), and further linked them to the genes from the  
339 regulatory elements with interrupted TFBSs. An extension of 10 kilobase pairs was added to the  
340 start and end positions of enhancers and an extension of 2 kilobase pairs was added to the start  
341 and end positions of promoters. We found that 83,842 SNPs out of 97,058 AD GWAS SNPs  
342 interrupt the binding sites of 787 TFs.

## 343 Identification of AD-Covid genes and regulatory networks

344 We compared the KEGG pathways<sup>50</sup> for AD (hsa05010) and Covid-19 (hsa05171). We found  
345 several AD-Covid common mechanisms: Nuclear Factor Kappa B (NFkB), Inhibitor of Nuclear  
346 Factor Kappa B Kinase (IKK), c-Jun N-terminal Kinase (JNK), Interleukin-6 (IL-6),  
347 Phosphoinositide 3-Kinase (PI3K), Tumor Necrosis Factor (TNF) alpha, and TNF Receptor. This  
348 implies potential mechanistic interplays between AD and Covid-19. Further, we found 22 genes  
349 involved in those AD-Covid common mechanisms that correlate highly with AD phenotypes in  
350 different brain regions. Pathview<sup>51</sup> was used to visualize the correlations of those genes and AD  
351 phenotypes. Also, for each brain region, we found the subnetworks of its gene regulatory  
352 network in AD that have TFs regulating those AD-Covid common genes as the region's AD-  
353 Covid regulatory network.

## 354 Gene expression analysis and machine learning prediction for Covid-19 355 severity from AD-Covid regulatory networks

356 To gauge the clinical predictive performance of our AD-Covid genes and networks in terms of  
357 predicting Covid-19 severities, we looked at a recent population RNA-seq gene expression data  
358 in blood of Covid-19 samples (GSE157103)<sup>52</sup> to check whether any genes from our AD-Covid  
359 regulatory networks can predict Covid-19 severities such as being in the Intensive Care Unit  
360 (ICU) or not. To this end, we first median normalized this gene expression data (19,472 genes)  
361 and then applied differentially expression analysis by DESeq2<sup>53</sup> between 50 ICU and 50 non-  
362 ICU Covid patients. The Volcano plot was used to highlight differentially expressed AD-Covid  
363 genes (adjust  $p < 0.05$ ). A smoothing factor of 0.01 was added to the numerator and denominator  
364 when computing the empirical  $\log_2(\text{fold change})$ .

365 In addition to differentially expression analysis which aims to find individual associated genes,  
366 we also performed machine learning analysis for the genes from our AD-Covid regulatory  
367 networks to see if they together can predict severe Covid-19 or not.

368  
369 In addition to our AD-Covid genes (from each region and combined), we also compared the  
370 machine learning prediction performance from other published Covid-19 genes. Since we are  
371 predicting Covid-19 severity, we compared predictive models from our lists with the respective  
372 performance of the benchmark list. A recent study<sup>54</sup> using U.K. Biobank GWAS data and Covid-  
373 19 mortality information discovered 8 Covid-19 susceptibility genes associated with an  
374 extremely high risk of Covid-19 mortality: DNAH7, CLUAP1, DES, SPEG, STXBP5, PCDH15,  
375 TOMM7, and WSB1. Another study<sup>55</sup> identified seven other risk genes (OAS1, OAS2 ,  
376 and OAS3, TYK2, DPP9, IFNAR2, CCR2) associated with severe and life-threatening Covid-19  
377 outcomes, including inflammatory organ damage. Numerous studies such as <sup>56</sup> have implicated  
378 ACE2 and TMPRSS2 as key genetic factors whose polymorphisms could be risk factors linked  
379 to greater Covid-19 susceptibility. We thus included all 17 genes, from these published studies,  
380 into a list of Covid-19 published genes, to use as our benchmark list.

381  
382 The Python package, Scikit-Learn<sup>57</sup>, was used for our machine learning analysis. The  
383 classification accuracy of each gene was calculated by 4-Fold Cross Validation (CV). For the 17  
384 published Covid-19 susceptibility genes, we performed Recursive Feature Elimination (RFE) CV  
385 based on a Support Vector Machine (SVM) classification model (with linear kernel, outputting  
386 predicted probabilities)<sup>58</sup>; this calculated the classification accuracy of each gene and the  
387 optimal number of published genes to use. We fixed all models to incorporate only this optimal  
388 number of genes. Then, to build a model for each of our input gene lists, we performed RFE  
389 based on linear SVM to then select the optimal number of predictive genes from the list for  
390 classifying ICU vs. non-ICU Covid-19 patients with high accuracy (i.e., feature selection). We  
391 then trained an SVM classification model again with those select predictive genes and reported  
392 the accuracy and AUROC values of the model using 4-Fold CV. Besides Covid severity, we  
393 also calculated the correlations of gene expression with Covid and non-Covid for the genes from  
394 the AD KEGG pathway for three brain regions.

395  
396 In addition, we also used Decision Curve Analysis (DCA)<sup>59</sup> to evaluate and compare the  
397 machine learning models of those brain-region AD-Covid genes and benchmark genes for  
398 predicting Covid severity. DCA has been widely used for making medical decisions to  
399 individuals, improving upon traditional comparison metrics (e.g., AUROC) for predictive models  
400 and other approaches that require additional information to address clinical consequences<sup>59</sup>.  
401 Particularly, given a model and a threshold probability pT, the patients will be sent to ICU if their  
402 percentage risks for Covid severity (i.e., ICU) from the model are greater than or equal to pT.  
403 Based on this, the true positive (TP) count is the number of Covid-19 severe individuals sent to  
404 the ICU, and the False Positive (FP) is the number of Covid-19 non-ICU individuals sent to the  
405 ICU. Thus, pT inherently represents subjective clinician preferences for FPs versus False  
406 Negatives (FNs: wrongly predicting a severe Covid-19 patient would not be severe and not  
407 sending them to the ICU). Based on TP, FP and pT, the DCA then calculates Net Benefit =  
408  $TP/N - ((FP/N)*pT/(1-pT))$ , where N is the total number of patients (N=100 here). Thus, the Net

409 Benefit represents the benefit of true positive ratio (TP/N) from false positive ratio (FP/N)  
410 weighted by odds of pT (i.e.,  $pT/(1-pT)$ ). DCA provides a simple, personalized risk-tolerance  
411 based approach of using pT to weight the FN and FP mistakes: lower thresholds represent a  
412 fear of FNs over FPs, and vice-versa. For instance, for a clinician who sends a Covid-19  
413 positive individual with predicted severity of at least  $pT = 20\%$ , the utility of treating a Covid-19  
414 severe individual is 4 times greater than the harm of needlessly sending a non-severe Covid-19  
415 patient to the ICU. Also, we compared our predictive models with 2 extremes: Treat All (predict  
416 1 for all Covid-19 positive patients and send all to the ICU regardless of severity) and Treat  
417 None (predict 0 for all positive patients and send none to the ICU). Practically, a clinician ought  
418 to opt for the predictive model or extreme intervention strategy with the highest Net Benefit  
419 based on that clinician's preferred pT; thus, two clinicians (who may have their own, different pT  
420 values) may obtain different optimal results. Thus, DCA can be used to evaluate the clinical  
421 usability of a Covid-19 severity prediction model based on its Net Benefit across clinically  
422 reasonable pT values. Finally, we performed the DCA using the codes provided by Memorial  
423 Sloan Kettering Cancer Center<sup>60</sup>.

## 424 Results

### 425 Gene co-expression network analysis reveals gene expression dynamics 426 for AD phenotypes across multiple brain regions

427 We first applied our analysis to population gene expression datasets of three major brains  
428 relating to AD: Hippocampal CA1, Lateral Temporal Lobe (LTL), and Dorsolateral prefrontal  
429 cortex (DLPFC) (**Methods and Materials**). We identified several gene co-expression modules  
430 showing specific gene expression dynamic changes for various AD phenotypes as below.  
431 These expression dynamics also imply potential underlying gene regulatory mechanisms in the  
432 phenotypes. In particular, given a brain region, we constructed and clustered a gene co-  
433 expression network for the region to a set of gene co-expression modules. In a gene co-  
434 expression network for a region, the nodes are genes and each edge represents that the two  
435 respective genes have correlated gene expression profiles during AD progression (i.e., co-  
436 expression). Also, there are likely groups of co-expressed genes within the network that form  
437 densely-connected sub-networks, also known as gene co-expression modules. Genes within a  
438 module share similar gene expression dynamics in the region for the observed AD phenotypes.  
439 We also used modular eigengenes (MEs) to represent such expression dynamics for a gene  
440 module, using the first principal components of modular gene expression matrices. The  
441 information for all modules with associated phenotypes is available in **Supplement files 1, 2**  
442 and **3** for Hippocampal CA1, Lateral Temporal Lobe and Dorsolateral prefrontal cortex,  
443 respectively.

444  
445 Hippocampal CA1. We identified 29 gene co-expression modules in the Hippocampal Ca1  
446 region (min. module size = 30 genes). We found that 21 out of 30 modules were significantly  
447 positively associated with at least one AD phenotype: AD progression, Braak Stage  
448 progression, aging, accumulation of NFTs, MMSE score cognitive impairment, AD, and being  
449 resilient. Also, their eigengenes show specific expression dynamics (**Fig. 2A** for 7 select

450 modules, **Fig. S2** for all modules). For instance, the pink and lightyellow modules tend to have  
451 higher expression values for individuals who do not have AD (Control Stage) and are clustered  
452 together. On the other hand, the greenyellow, yellow, magenta, and tan modules have higher  
453 expression levels for AD individuals and cluster together. In between those groups of modules  
454 is the midnightblue module, which has relatively high expression for some Control Stage and  
455 some AD individuals.

456  
457 Next, using these expression dynamic patterns, we further linked these gene modules to those  
458 key AD phenotypes (**Fig. 2B**) using their significant correlations (**Fig. S3** and **Supp. file 1** for all  
459 modules). For instance, the greenyellow module has significantly high correlations with AD,  
460 AD progression (e.g., moderate and severe stages), Braak 6 Stage and cognitive impairment.  
461 The tan module has the highest correlation ( $r = 0.68$ ) with the Severe Stage, along with other  
462 AD-related phenotypes. The midnightblue module is more significant ( $r = 0.02$ ) for the Braak 4  
463 Stage, where affected individuals typically exhibit mild symptoms of dementia. The lightyellow  
464 module is significant for cognitive resilience ( $r = 0.5$ ), which is the ability of individuals to exhibit  
465 stronger cognitive functioning despite AD pathology. Moreover, the lightyellow module has a  
466 strong positive correlation with better MMSE performance ( $r = 0.58$ ) than the pink module ( $r =$   
467  $0.44$ ). Instead, the pink module is more significantly correlated with the Braak 3 Stage ( $r =$   
468  $0.45$ ).

469  
470 Lateral Temporal Lobe. We identified 56 gene co-expression modules and found that 28  
471 modules are significantly positively correlated with AD phenotypes of interest. We highlighted  
472 five modular eigengenes in **Fig 2C** showing specific expression dynamics for AD phenotypes in  
473 LTL (**Fig. S4** for all modules). In total, we found that 12 gene modules are positively associated  
474 with AD Progression, 1 with Aging (mediumpurple3), 1 with Gender (lightgreen), 12 with the  
475 Control Stage, and 2 with the Initial Stage (associated with Braak 1 and 2 Stages). As shown  
476 in **Fig. 2C**, the sienna3 module has higher expression values for both old and young individuals  
477 in the Control Stage. The orange, magenta, and yellow modules are clustered together and  
478 have higher expression values for AD samples. The midnightblue module is clustered between  
479 both groups and tends to be associated with higher Braak stages. As shown in **Fig. 2D**, the  
480 sienna3 module also has a statistically significant positive correlation with the Control Stage ( $r =$   
481  $0.63$ ) and asymptomatic based on the Braak stage ( $r = 0.55$ ). The midnightblue module is  
482 associated with aging, average Braak stage, clinical Braak stage, and AD. The yellow, orange,  
483 and magenta modules are associated with aging, AD and Braak progression phenotypes, and  
484 neuritic plaque accumulation (based on the CERAD score); the orange module has a very  
485 strong correlation with dementia Braak stages ( $r = 0.72$ ) and AD ( $r = 0.72$ ). More module-  
486 phenotype associations are available in **Fig. S5** and **Supplementary File 2**.

487  
488 Dorsolateral prefrontal cortex. We found 35 gene co-expression modules for DLPFC. **Figs. 2E**  
489 and **2F** highlighted 6 of those gene modules: darkolivegreen, yellow, red, royalblue, tan, and  
490 green (**Figs. S5-6** for all modules). Those modules are significantly associated with various AD  
491 phenotypes such as progression, MMSE, APOE genotype and neuritic plaques. Larger sample  
492 size for the DLPFC, which is over 20 times larger than that for the Hippocampal or LTL regions,  
493 likely attributes to the relatively lower correlation coefficients between modules and AD

494 phenotypes in DLPFC. However, we still see significantly correlated modules with various AD  
495 phenotypes (Fig. 2F,  $p < 0.05$ ). For example, the tan gene module is associated with the worst  
496 APOE genotype, APOE E4/E4 ( $r = 0.082$ ), AD diagnosis age ( $r = 0.12$ ) and points lost on the  
497 last MMSE ( $r = 0.09$ ). The royalblue and green modules are statistically significantly positively  
498 correlated with the Severe Stage based on the last MMSE score, with correlations of  $r = 0.22$   
499 and  $r = 0.2$ , respectively. In terms of better outcomes, the darkolivegreen module is significant  
500 for the Control Stage ( $r = 0.11$ ), better performance on the last MMSE ( $r = 0.17$ ), and cognitive  
501 resilience ( $r = 0.12$ ). Furthermore, the red module is also significant for better performance on  
502 the last MMSE ( $r = 0.15$ ) and has a similar correlation as the darkolivegreen module for  
503 cognitive resilience.

504

505 Therefore, those AD-phenotype-associated gene co-expression modules uncover the specific  
506 gene expression dynamic patterns across phenotypes and suggest that those co-expressed  
507 genes in the same modules are likely involved in similar functions and pathways for the  
508 phenotypes. To understand this, we further performed the enrichments analysis of the modules  
509 as follows.

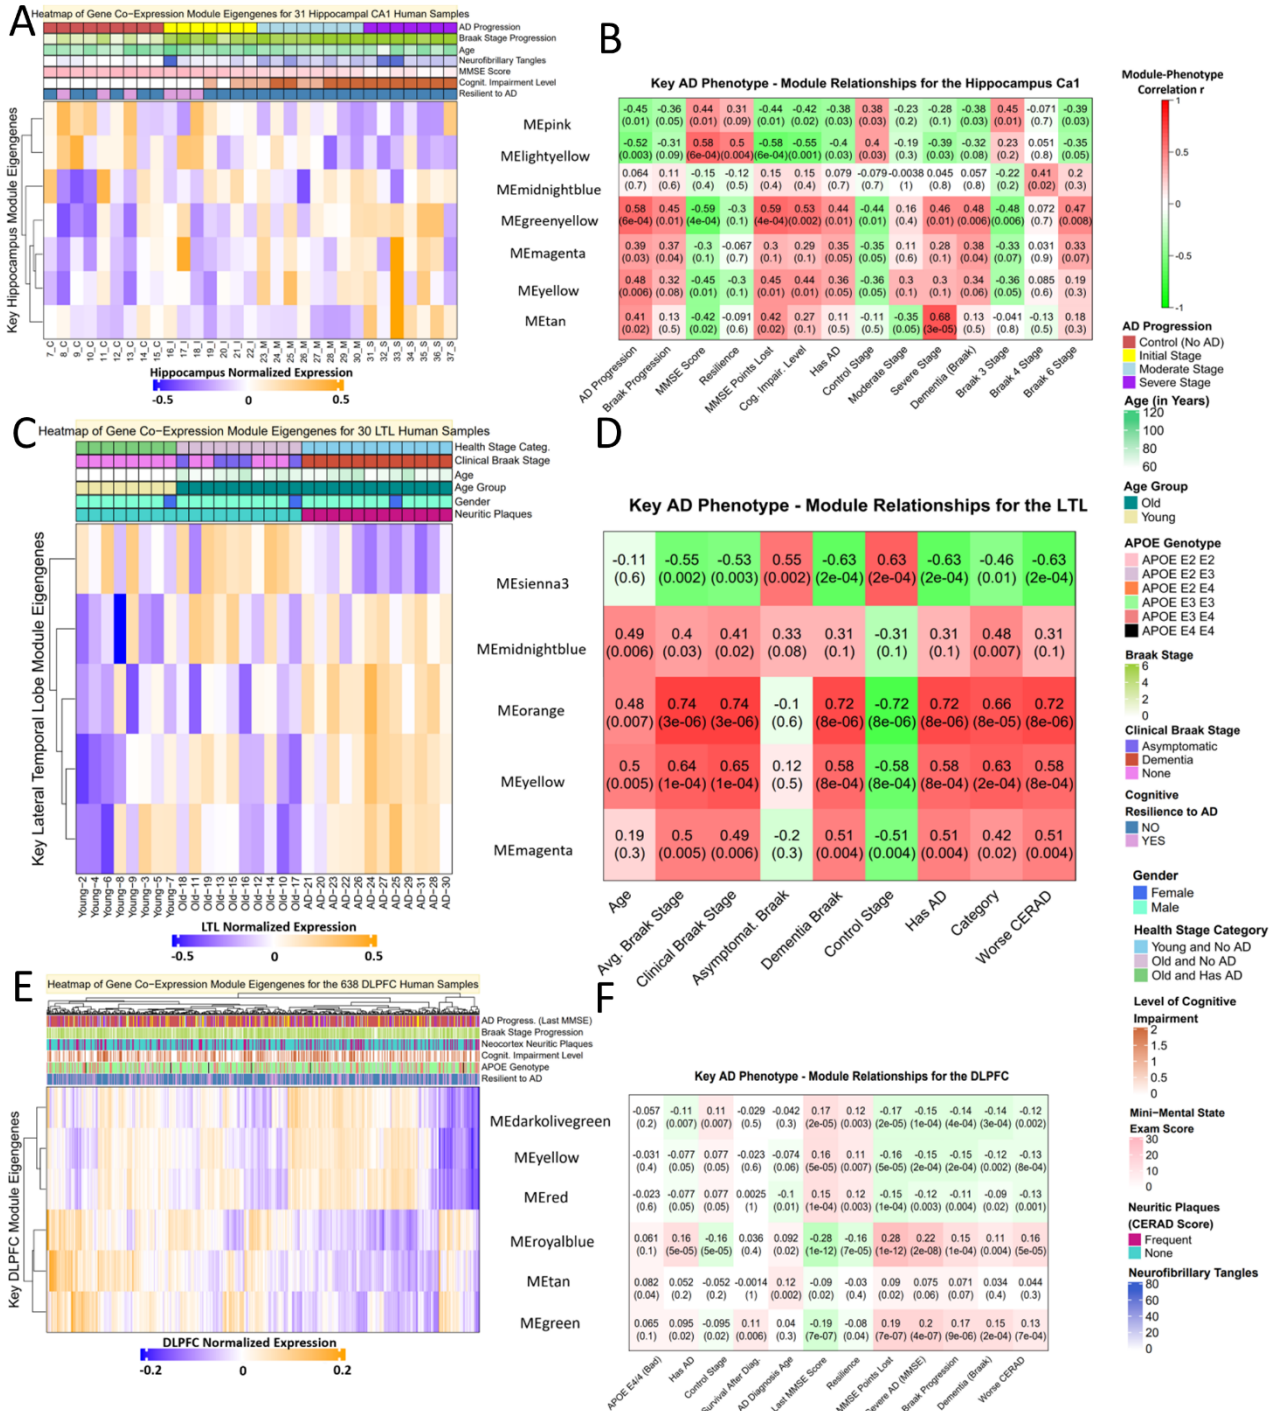

510  
511 **Fig. 2 – Gene co-expression modules significantly associated with AD phenotypes show**  
512 **specific expression dynamic patterns across phenotypes.** Top heatmaps show the  
513 eigengenes of select gene co-expression modules in Hippocampal CA1 region (A), LTL (C) and  
514 DLPFC (E). Rows: modules. Columns: individual samples. Red: high expression level. Blue: low  
515 expression level. Bottom heatmaps show the correlation coefficients and p-values between  
516 select modules and AD phenotypes in Hippocampal CA1 region (B), LTL (D) and DLPFC (F).

517 Row: modules. Columns: AD phenotypes. Red: highly positively correlation. Green: highly  
518 negatively correlation.

## 519 Eigengenes and enrichments of co-expression modules reveal hub genes, 520 gene functions and pathways in AD phenotypes

521 Gene module enrichment analysis allows us to better understand the biological functions,  
522 structures, diseases, and other observed biological phenomena associated with AD  
523 phenotypes. Through enrichment analysis (Methods), we found enriched functions and  
524 pathways of AD modules and then linked them to various AD phenotypes associated with the  
525 modules (**Fig. 3** and **Supplementary document**). Overall, healthier phenotypes are the Control  
526 Stage (No AD), cognitive resilience, and protective APOE E2/E2 genotype.

527  
528 Hippocampal CA1 (**Fig. 3A, Supplementary file 1**): The modules for non-AD phenotypes (e.g.,  
529 control and resilience) are enriched with synaptic plasticity and dendrite development,  
530 norepinephrine neurotransmitter release cycle, and calcium signaling pathway, which can be  
531 typically dysregulated in AD<sup>61</sup>. This also suggests that resilient individuals may be protected  
532 from microsatellite instability and amyloid accumulation that may even occur naturally<sup>62</sup>. Further,  
533 our analysis supports recent hypotheses on dysregulated immune systems in AD. We found  
534 that aging, NFTs, and AD developmental phenotypes are associated with abnormal innate  
535 immunity and interleukin-6 secretion. Our cognitive impairment, Braak progression, and AD  
536 modules also have enrichments for: viral genes and Covid-19 spike glycoprotein (that trigger an  
537 immune response), activated TAK1 mediating p38 MAPK activation (linked to tau  
538 phosphorylation, neurotoxicity, neuroinflammation, synaptic dysfunction, and worse AD<sup>63</sup>), and  
539 NFkB pathway (impaired and over-expressed during AD, leading to neuroinflammation,  
540 microgliosis<sup>64</sup>, and suppression of Wnt Signaling<sup>65</sup>). Moreover, we found an association  
541 between Severe AD and immunologic memory, antigen-antibody interactions, and regulation of  
542 Interferon-Alpha Signaling. Interferon response to immunogenic amyloid may activate  
543 microglia, initiate neuroinflammation, and lead to synaptic loss<sup>66</sup>. Finally, many AD phenotypes  
544 are associated with Death Receptor Signaling, positive regulation of gliogenesis, Constitutive  
545 Signaling by aberrant PI3K in Cancer, and positive regulation of JNK cascade (activated in AD  
546 brains and involved in tau phosphorylation and neuronal death)<sup>70</sup>. Xenobiotic Metabolic  
547 Processes are specific to Severe AD modules only, and studies<sup>67</sup> have found links between  
548 dementia progression and various metabolic pathways.

549  
550 LTL (**Fig. 3B, Supplementary file 2**): First, control modules are indeed enriched with several  
551 pathways that are typically present in healthy conditions, such as Wnt signaling, Actin  
552 organization and transmission across chemical synapses. Dysregulation of those pathways has  
553 been reported to lead to AD and neurodegeneration, e.g., Wnt signaling to inhibit amyloid-beta  
554 production and tau protein hyperphosphorylation in AD progression<sup>68</sup>. Second, in the LTL  
555 modules for AD and large neuritic plaques, Frontotemporal Dementia (FTD) and Loss of Nlp  
556 from Mitotic centrosomes are enriched, and the latter may lead to reduced microtubule stability,  
557 abnormal cellular morphology, and functions in AD<sup>69</sup>. Also, we found cell-type specific  
558 enrichments in the AD progression related phenotypes, e.g., astrocyte projection for clinical  
559 braak stage and asymptomatic. Astrocytes are increasingly activated near amyloid plaques in



560 LOAD, producing pro-inflammatory cytokines and reactive oxygen species<sup>70</sup>. Additional  
561 previously identified AD-related functions and pathways include postsynaptic differentiation,  
562 stress-activated signaling, TRAF-mediated NF- $\kappa$ B activation, prion pathway and epigenetic  
563 modifications. The feedback loop of the prion pathway is likely disrupted during AD leading to  
564 A $\beta$  accumulation<sup>71</sup>. The epigenetic modifications (e.g., Histone H4 acetylation) can be  
565 dysregulated to affect gene expression of long-term potentiation and memory formation in AD<sup>72</sup>.

566 **DLPFC (Fig. 3C, Supplementary file 3):** The resident macrophage brain cells, microglia, tend  
567 to exclusively express most AD risk genes like APOE<sup>73</sup>. Our APOE E2 modules were shielded  
568 from neurotoxins and associated with mitochondrial inheritance ( $p < 1e-16$ ), while our E4  
569 modules are strongly enriched for cellular response to A $\beta$  and cognitive dysfunction. Having  
570 both high risk E4 alleles (instead of only 1 E4 allele) is not associated with mitochondrial  
571 depolarization. Still, it is more strongly associated with Serum Amyloid A Protein ( $p < 1e-28$  vs.  
572  $p < 1e-16$ ), monocyte chemoattractant proteins, and neuroimmunomodulation.

573  
574 We found several strong promising associations (some with  $p < e-58$ ) for APOE4-related and  
575 cognitive impairment modules, supporting the crucial role of the immune system and reactive  
576 microglia in AD onset and pathogenesis. These include astrocyte activation (boosting  
577 production of proinflammatory cytokines and phagocytic capabilities<sup>74</sup>), abnormal circulating  
578 cytokine level and innate immunity, synapse pruning (excess in Schizophrenia<sup>75</sup>),  
579 neuroinflammatory responses, autoimmune diseases (Wegener's Granulomatosis), abnormal  
580 macrophage physiology, Microglia Pathogen Phagocytosis Pathway, and microglial cell  
581 activation (key to ALS and Multiple Sclerosis pathology<sup>76</sup>). During early synaptic decline in AD,  
582 microglia may change shape, functions, and pathways, express more receptors and  
583 inflammatory molecules (cytokines, chemokines), become more phagocytic and activated, and  
584 go awry, leading to neuroinflammation and cell death<sup>73</sup>. Except for neurotransmitter reuptake,  
585 our other AD phenotype (ex. severe stage, Braak progression, plaques, cognitive impairment,  
586 survival post diagnosis) modules share many biological associations with our APOE4 modules,  
587 like: Immune System diseases, Covid-19, inflammation mediated by chemokines and cytokines,  
588 natural killer mediated immunity. Besides, the modules for non-AD phenotypes like control and  
589 resilience are also enriched with pathways that may be dysfunctional in AD such as the Electron  
590 Transport Chain<sup>77</sup>, neuron recognition, calcium ion regulated exocytosis, mitotic spindle  
591 checkpoint, and synaptic plasticity.

592  
593 **Comparison Across Brain Regions (Fig. 3D):** We also found that many enriched pathways for  
594 AD phenotypes are shared by different brain regions. In particular, the datasets of three brain  
595 regions share major phenotypes (control, AD, and clinical Braak stage). The modules from three  
596 regions for those shared phenotypes are all enriched with physiological adaptation. Also, many  
597 of our modules from different brain regions are enriched with immunological functions that have  
598 been recently studied in AD<sup>78</sup>. For instance, the Hippocampal and DLPFC modules for control  
599 and AD share neuroimmunomodulation. The MAPK cascade (associated with control modules  
600 in all 3 regions) is associated with stress-activation in the AD and Braak modules in the  
601 hippocampus and LTL, which has been reported to be dysregulated in AD<sup>79</sup>. These AD and  
602 Braak modules in multiple brain regions are also enriched with the Ki-1 antigen, a tumor marker

603 of activated immune cells regulating NF-kB and apoptosis<sup>80</sup>, proto-oncogenes, dendritic antigen-  
 604 presenting cells, diabetes complications, focal adhesion (plaques), and angiogenesis VEGFA-  
 605 VEGFR2 Signaling. The VEGFA-VEGFR2 pathway promotes neural cell survival, migration, and  
 606 proliferation, and has altered levels in AD that may impact the role of microglia<sup>81</sup>. Moreover, the  
 607 AD and Braak modules across regions have common brain enrichments such as Blood-Brain  
 608 Barrier, virus attachment, Complement Activation (innate immune-mediated defense<sup>82</sup>, altered  
 609 in AD<sup>74</sup>), and Oligodendrocyte differentiation (potentially impacted by Aβ accumulation and  
 610 associated with neurodegeneration<sup>83</sup>). Finally, the control modules across regions are enriched  
 611 for higher cellular energy levels like ATP synthesis, Mitochondrial proteins. In particular, the  
 612 DLPFC and Hippocampal control modules are enriched with Calcium Signaling, LTP,  
 613 Presynaptic Terminals, regulation of dendrite development, and positive regulation of  
 614 neurogenesis.

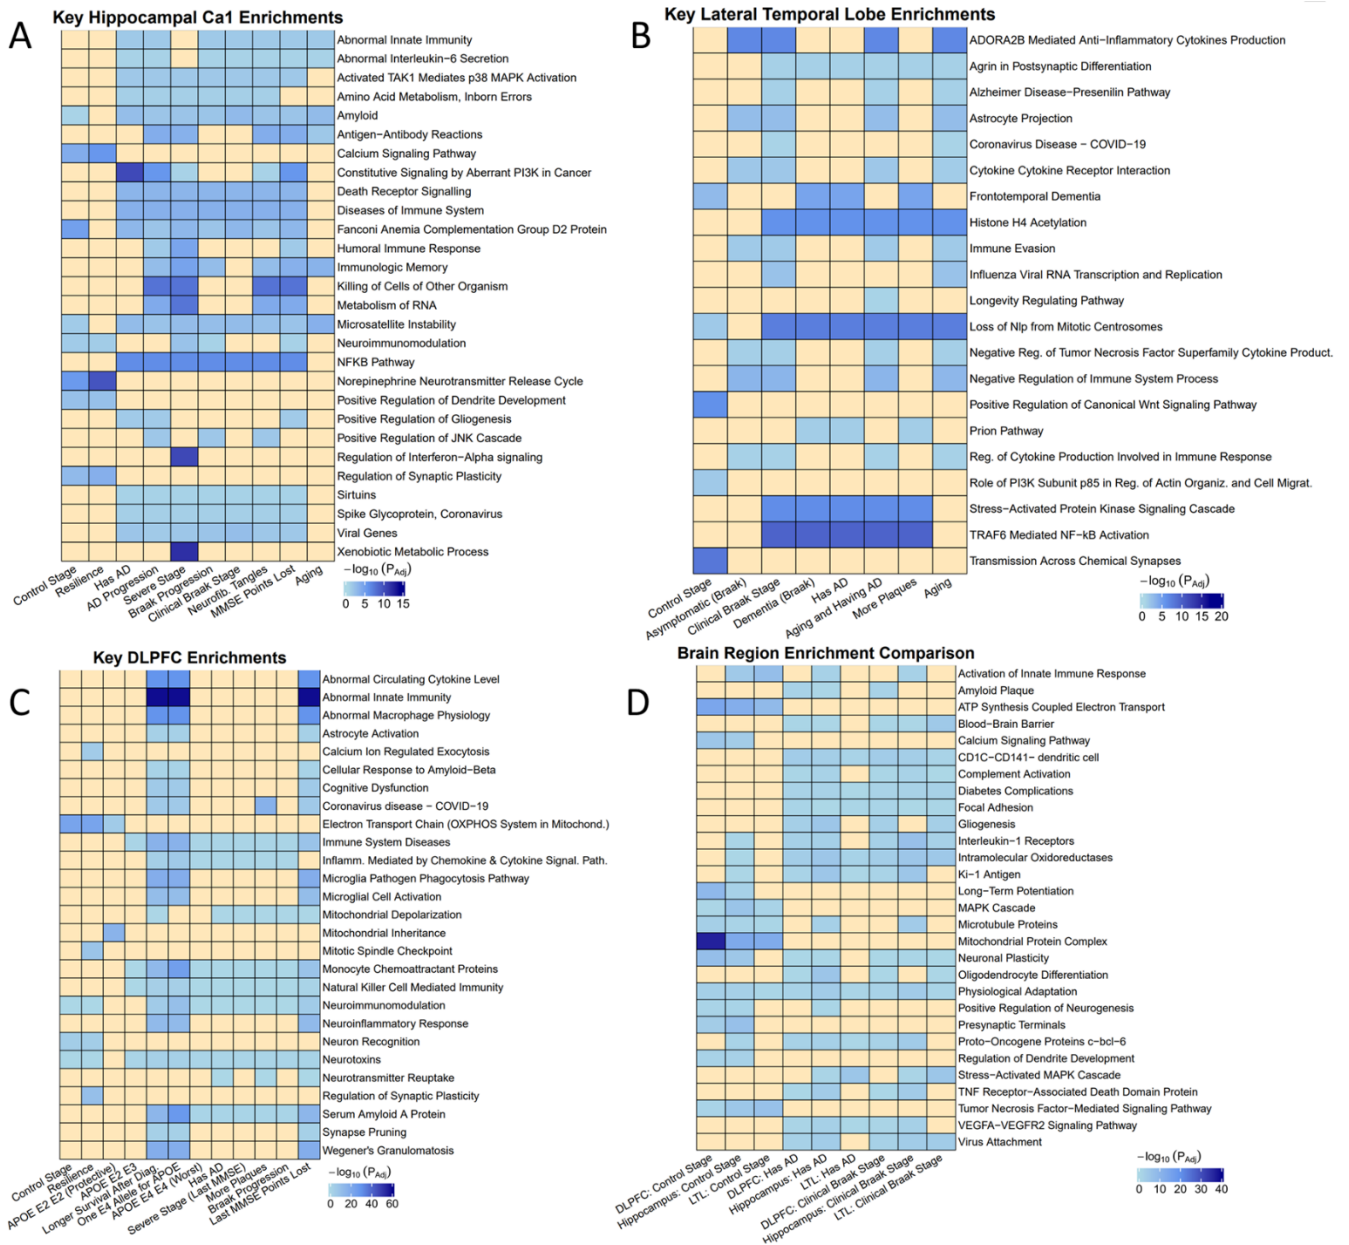

615

616 **Fig. 3 – Select enriched functions and pathways of gene co-expression modules for**  
617 **various AD phenotypes. (A) Hippocampus; (B) Lateral Temporal Lobe (LTL); (C) DLPFC; (D)**  
618 **Across three regions. Rows: select enriched terms (Methods). Columns: AD phenotypes. The**  
619 **heatmap colors correspond to  $-\log_{10}(\text{adjust p-value})$ .**

## 620 Prediction of brain-region gene regulatory networks for AD phenotypes

621 To understand underlying molecular mechanisms regulating gene expression associated with  
622 various AD phenotypes, we predicted the gene regulatory networks (GRNs) for genes and gene  
623 modules of brain regions, especially using multi-omics data (Methods). The brain-region GRNs  
624 link transcription factors (TFs) and regulatory elements (REs, e.g., enhancers or promoters) to  
625 target genes (TGs) and co-expressed genes (e.g., from same modules). The regulatory network  
626 edges can be activation or repression. Moreover, these GRNs can be further linked to the AD  
627 phenotypes significantly associated with TGs and modules. As described in Methods, we  
628 applied multiple widely-used approaches and public databases to predict the networks and  
629 finally used shared predictions across different approaches as highly confident GRNs. In terms  
630 of candidate TFs, we found: 1,043 in the Hippocampus, 1,580 in the LTL, and 1,588 in the  
631 DLPFC, which we input into RTN, Genie3, and Trena. As shown in **Table S2**, we obtained  
632 6,823,631 TF-RE-TG network edges of three brain regions' GRNs, corresponding to  
633 973,025 unique TF-TG pairs, 20,601 TGs and 709 TFs. In particular, the hippocampal GRN  
634 has 2,810,102 TF-RE-TG edges, including 169,292 unique TF-TG pairs, 11,972 TGs and 351  
635 TFs. The GRN of Lateral temporal lobe has 161,404 TF-RE-TG edges, including 65,321 unique  
636 TF-TG pairs, 13,791 TGs and 402 TFs. The GRN of DLPFC has 3,852,125 TF-RE-TG edges,  
637 including 752,169 unique TF-TG pairs, 13,511 TGs and 670 TFs. Detailed edge lists of  
638 hippocampus and LTL GRNs are provided in **Supplementary files 4-5**.

639

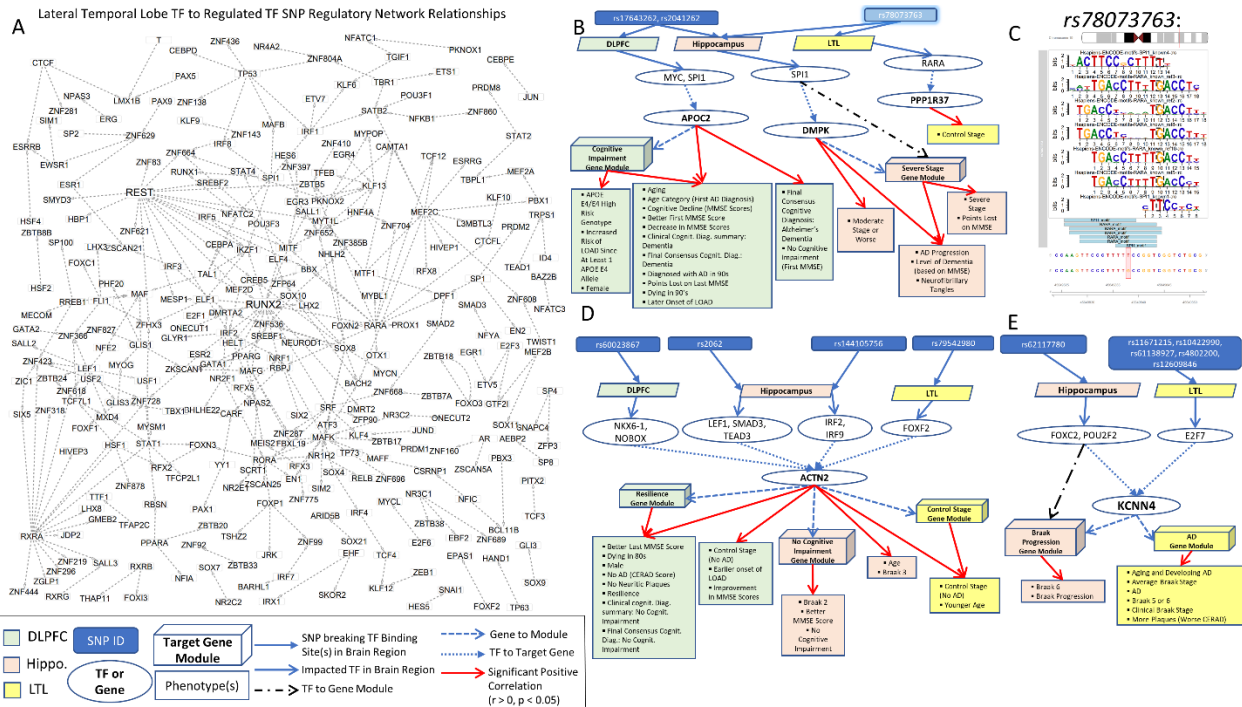

640  
 641 **Fig. 4 – Select gene regulatory networks (GRN) linking AD risk variants (GWAS SNPs) to**  
 642 **AD phenotypes.** (A) Subnetwork of LTL GRN among TFs (i.e., the target genes (TGs) are TFs  
 643 too). Nodes are TF genes. The edges connect TFs to their TGs. Besides, TFs have the binding  
 644 sites interrupted by AD SNPs on the regulatory elements to TGs. (B) Example of 3 AD SNPs  
 645 that interrupt binding sites of TFs in different brain regions. The AD phenotypes and gene  
 646 modules positively correlated with APOC2, DMPK, and PPP1R37 expression are shown. (C)  
 647 SNP rs78073763 interrupts multiple possible binding sites of SPI1 in Hippocampus and RARA  
 648 in LTL. Additional regulatory links from AD SNPs to interrupted TFs to TGs along with  
 649 associated phenotypes and modules are shown in (D) regulation of ACTN2 in all three regions,  
 650 (E) FOXC2, POU2F2, and E2F7 to KCNN4 in hippocampus and LTL.

651 Identification of disease risk variants for AD phenotypes via integration of  
 652 GWAS and gene regulatory networks

653 Over 90% of disease risk variants (e.g., GWAS SNPs) are in the non-coding regions<sup>18</sup>. For  
 654 instance, we found that GWAS SNPs for AD are enriched in the regulatory elements of our  
 655 GRNs as above. Thus, it is crucial to further understand how those disease risk variants affect  
 656 gene regulatory mechanisms that eventually impact AD phenotypes such as progression. To  
 657 this end, we linked AD GWAS SNPs to our GRNs to see how those SNPs interrupt the binding  
 658 sites of TFs on the enhancers or promoters that regulate target genes and modules (Methods).  
 659 These SNPs can also be linked to various AD phenotypes of corresponding genes and modules  
 660 for different brain regions, i.e., “brain-region risk variants for AD phenotypes”. Specifically, we  
 661 found that 39,832 unique AD SNPs disrupted TFBSs on the regulatory elements of three brain-  
 662 region GRNs (35,940 for Hippocampus, 7,119 for LTL, 2,359 for DLPFC, **Fig. S8**). Across three  
 663 regions, there are 543 unique TFs whose binding sites were interrupted, regulating 11,596  
 664 genes (**Table S3**).

665 For instance, a subnetwork of the LTL GRN between TFs is shown in **Fig. 4A**, i.e., the target  
666 genes are also TFs. These subnetwork TFs also have interrupted TFBSs on the regulatory  
667 elements to their target genes. We found that several TFs are the hub genes of the subnetwork  
668 like RUNX2 (11 TFs experience difficulty in binding and regulating RUNX2) and neurogenesis  
669 TF REST (experiences difficulty in regulating 16 TFs in LTL). In fact, REST is induced by Wnt  
670 signaling, represses genes (like PLCG2) that promote cell death or AD pathology, protects  
671 neurons from A $\beta$ -protein toxicity<sup>84</sup>. We found that during AD, PLCG2 is overexpressed in the  
672 LTL, which may be partly explained by REST's inability to bind to chromatin and repress its  
673 target genes<sup>85</sup>; this may lead to changes in autoinflammation, immune disorders, and changes  
674 in immune cell functioning<sup>86</sup>; moreover, we found that REST significantly regulates the turquoise  
675 gene module in the LTL (**Figs. S9-10**). The subnetwork of the DLPFC GRN between TFs (**Fig.**  
676 **S11**) has the hub genes: CREB3L1 (26 TFs are unable to properly regulate CREB3L1) and  
677 PAX5 (has difficulty in regulating 11 TFs). Lastly, the Hippocampal GRN SNP subnetwork  
678 between TFs has hubs such as ZNF226 (21 TFs experience difficulty regulating ZNF226) and  
679 GATA2 (unable to regulate 65 TFs in AD Hippocampus). In the Hippocampus, ZNF226  
680 significantly regulates 3 modules (2 which are associated with the Control Stage) and GATA2  
681 significantly regulates 4 modules (1 Control Stage module and 2 modules associated with  
682 worsening AD phenotypes) (**Figs. S12-13**).

683  
684 Furthermore, we found several regulatory networks, which provide more insights on the possible  
685 association of various non-coding SNPs with AD phenotypes. **Fig. S14** provides a detailed  
686 explanation of how to interpret such networks. In **Fig. 4B**, we examine the varying effect of a  
687 given SNP on gene regulation across brain regions, and the impact on 3 target genes: APOC2,  
688 DMPK, and PP1R37. For instance, SNP rs78073763 (**Fig. 4C**) changes the DNA base from a T  
689 to a G (at chr19:45649838) and breaks the binding of RARA on the enhancer of Control Stage  
690 gene PPP1R37 in the LTL and SPI1 binding to the DMPK enhancer in the Hippocampus. A  
691 recent study found that PPP1R37 expression is strongly associated with APOE expression and  
692 has extensive cross-tissue effects on AD and that DMPK expression in the hippocampus and  
693 putamen strongly impact AD<sup>87</sup>. We found that increased expression of DMPK is associated with  
694 worsening AD phenotypes (ex. Moderate Stage or worse, AD progression, more severe  
695 dementia, NFTs). Two extremely statistically significant AD SNPs (rs17643262 and rs2041262;  
696  $p < 2e-13$ ) that disrupt SPI1 regulation of DMPK in the Hippocampus also disrupt SPI1  
697 regulation of APOC2 in the DLPFC; APOC2 is associated with a cognitive impairment gene  
698 module, Alzheimer's dementia, cognitive decline, and having at least 1 APOE E4 allele. SPI1  
699 is a well-known master regulator in microglial cells, plays a key roles in regulating immune  
700 functions in AD<sup>88</sup>, is strongly correlated with AD ( $r = 0.355$ ) and AD Progression ( $r = 0.375$ ),  
701 Braak progression ( $r = 0.437$ ), Braak 6 ( $r = 0.407$ ), and belongs to a Severe AD Stage gene  
702 module ( $r = 0.41$ ). This suggests a low-level expression of SPI1 in hippocampus control  
703 samples, which potentially reduced microglial-mediated neuroinflammatory responses and  
704 delayed AD onset<sup>89</sup>. SPI1 regulation in the Hippocampus by 10 TFs (ex. RXRA, RARA, NFKB1)  
705 is disrupted by several SNPs (**Fig. S15**). The regulated genes by SPI1 are also upregulated in  
706 microglia, leading to microglia-mediated neurodegeneration in AD<sup>89</sup>; in fact, SPI1 significantly  
707 regulates DMPK and its Severe Stage gene module in the Hippocampus. Our results further  
708 underscore the role of the microglia and immune system in AD onset and progression and

709 neuroinflammation. In addition, MYC regulation of APOC2 in the DLPFC is also impacted.  
710 Abnormalities in MYC functioning may lead to dysregulation in cellular processes such as cell  
711 cycle activation and Wnt Signaling and re-entry mediated neuronal cell death in AD<sup>90</sup>.

712  
713 In **Fig. 4D**, we present an example of a gene, ACTN2 (cytoskeletal alpha-actin protein), whose  
714 regulation in all 3 brain regions, is impacted by various SNPs, and whose expression is  
715 associated with healthier outcomes. Across the 3 brain regions, we observe that ACTN2  
716 expression is positively associated with the cognitive resilience DLPFC gene module, no  
717 cognitive impairment Hippocampus gene module, and Control Stage LTL gene module.  
718 Increased expression of ACTN2 may be associated with improvements in MMSE scores and is  
719 found at the neuronal synapse, and is a highly ranked gene in a previous study on  
720 echocardiographic traits, heart function, and AD<sup>91</sup>. Several SNPs impact ACTN2 expression in  
721 the DLPFC and Hippocampus, but we focused on SNPs shared by several TFs in this Figure.  
722 Here, rs60023867 disrupts regulation of ACTN2 in the DLPFC by both NKX6-1 and NOBOX. In  
723 the Hippocampus, rs2062 disrupts regulation of ACTN2 by 3 TFs (LEF1, SMAD3, and TEAD3)  
724 and rs144105756 impacts IRF2 and IRF9 regulation of ACTN2. Lastly, in the LTL, rs79542980  
725 may lead to FOXF2 dysregulation of ACTN2.

726  
727 Also, we found different SNPs in the Hippocampus and LTL that impact regulation of KCNN4, a  
728 key AD drug target that is overexpressed during AD (**Fig. 4F**). In **Fig. S16**, we visualize the  
729 impact of rs62117780 on FOXC2 and POU2F2 regulation of KCNN4 in the hippocampus and  
730 rs4802200 on E2F7 regulation of KCNN4 in the LTL. FOXC2 and POU2F2 also regulate  
731 KCNN4's Hippocampal Braak Progression module. KCNN4 belongs to an AD LTL module, so  
732 increased KCNN4 expression is associated with AD progression in both regions. Previous  
733 studies found that KCNN4 is primarily expressed in macrophages and microglia and regulates  
734 microglia activation by modulating Ca<sup>2+</sup> influx signaling and membrane potential<sup>85</sup>. Thus, it has  
735 low expression in healthy neurons, and is associated with neuroinflammation and reactive  
736 gliosis during AD. Blocking KCNN4 likely curbs microglial neurotoxicity, leading to slower  
737 neuronal loss and better memory levels<sup>92</sup>. Therefore, this link uncovers how AD SNPs regulate  
738 KCNN4 expression in AD phenotypes.

739  
740 Finally, we highlighted all possible SNPs that interrupt TFBSs in our brain region GRNs via  
741 Manhattan plots (**Figs. S17-21**): **S18** (hippocampus), **S19** (LTL) and **S20** (DLPFC). 268 SNPs  
742 were found in all 3 regions and are examined in **Figs. S21-24**. Regulatory links from AD SNPs  
743 to interrupted TFBSs and regulatory elements to target genes and modules is provided in  
744 **Supplementary files 6-8**. We provide additional examples and explanations of regulatory  
745 networks linking non-coding SNPs to AD phenotypes for the networks, which we visualize in  
746 **Figs. S25-28**.

747

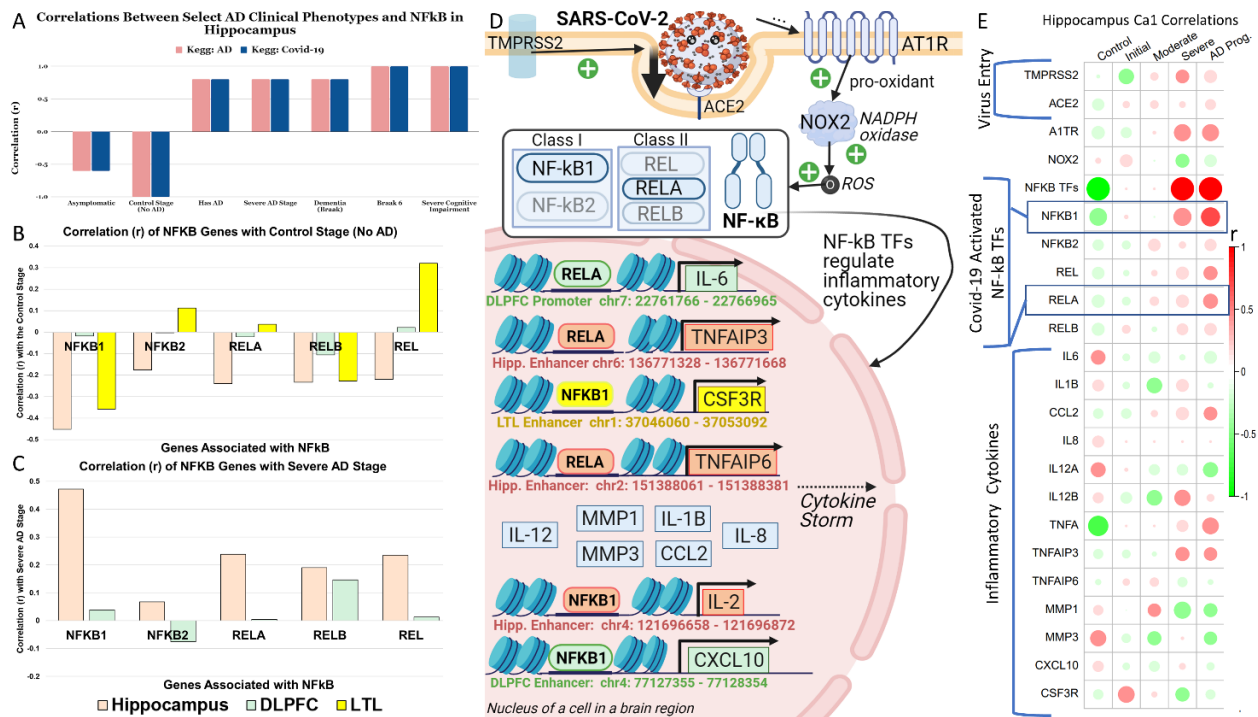

748  
749 **Fig. 5 – Gene regulatory networks and phenotypes for NFKB, a shared pathway of AD**  
750 **and Covid-19.** (A) Pearson correlations of the NFKB pathway (KEGG:hsa05171) and AD  
751 pathway (KEGG: hsa05010) with AD phenotypes from the Pathview analysis of hippocampal  
752 expression data of pathway genes<sup>51</sup>. (B) Pearson correlations of NFKB TFs (NFKB1, NFKB2,  
753 RELA, RELB, and REL) with Control in three regions. (C) Pearson correlations of NFKB TFs  
754 with Severe stage in Hippocampus and DLPFC. (D) Covid-19 virus spike and gene regulation of  
755 NFKB TFs from our hippocampal, LTL, and DLPFC GRNs for pro-inflammatory cytokines linked  
756 with severe Covid-19 outcomes. Gray dashed arrows indicate regulation and black arrows  
757 indicate activation of cytokines by the TF. (E) Correlations between AD phenotypes and  
758 expression levels of genes from (D) in the hippocampus.

759 **Gene regulatory networks and AD phenotypes associated with shared**  
760 **pathways between Covid-19 and AD**

761 Recent Covid-19 virus has widely affected the elders with neurodegenerative diseases including  
762 AD, suggesting potential links between Covid-19 and AD. We found that many significantly  
763 up/down-regulated genes in Covid-19 present in the AD KEGG pathway and  
764 positively/negatively correlated with AD in three regions. To understand molecular mechanisms  
765 across two diseases, we look at shared AD-Covid pathways such as the NFKB pathway  
766 involved in adverse effects and inflammation in both AD and Covid-19<sup>93</sup>. There are five TFs:  
767 NFKB1, NFKB2, REL, RELA, and RELB (proto-oncogene near APOE) involved in this pathway  
768 that regulate cellular processes including inflammation, cell growth, apoptosis<sup>94</sup>. Further, in both  
769 AD and Covid-19, Reactive Oxygen Species activate RELA and NFKB1 that then transcribe  
770 pro-inflammatory cytokines (typically secreted by macrophages), like: IL-6, IL-1B, and TNF,  
771 reducing LTP in AD, leading to an exaggerated and potentially lethal immune response in  
772 Covid-19 (e.g., tissue injury, Acute Respiratory Distress Syndrome (ARDS)<sup>93</sup>) (Fig. S29). We

773 found that in general, the gene expression levels of those NFKB TFs positively correlate with  
774 AD phenotypes such as severity but negatively with control in all three regions (**Fig. 5A** for  
775 hippocampus, **Fig. S30** for LTL, and **Fig. S31** for DLPFC). For instance, NFKB1 and RELB  
776 negatively correlate with controls in three regions, and so are NFKB2 and RELA in  
777 hippocampus and DLPFC (**Fig. 5B**). However, all five TFs positively correlate with AD severity  
778 in the hippocampus and two of them in DLPFC (**Fig. 5C**). Since the up-regulation of these NF-  
779 kB TFs is also linked to greater inflammatory responses in Covid-19 infected individuals<sup>93</sup>, this  
780 result implies that the gene expression of NFKB TFs is a potential interplay between AD and  
781 Covid-19. Thus, we further investigated our gene regulatory networks involving NFKB TFs to  
782 understand possible regulatory mechanistic links across AD and Covid.

783  
784 To this end, we looked at the impact of the NFKB pathway in SAR-CoV-2 to additional  
785 molecules (KEGG: hsa05171) (**Fig. 5D**). In particular, to enter the cell, the SARS-CoV-2 Spike  
786 protein is primed by TMPRSS2, binds to ACE2 (highly expressed in macrophages and the  
787 brain<sup>95</sup>), and interacts with A1TR (elevates viral entry and infection<sup>96</sup>). We also found that the  
788 expression levels of TMPRSS2, ACE2, and A1TR receptors are negatively correlated with  
789 controls but positively associated with late AD stages in hippocampus (**Fig. 5E**). Moreover, in  
790 our brain region GRNs, NFKB1 and RELA regulate genes of several cytokines associated with  
791 the severe Covid-19 Cytokine Storm. For instance, in the DLPFC, RELA regulates IL-6 via the  
792 promoter and particularly activates CXCL10 (biomarker whose altered levels are associated  
793 with immune dysfunction, tumor development, and disease severity<sup>97</sup>) by binding to the  
794 enhancer. In the LTL, NFKB1 binds to the enhancer of hematopoietic growth factor and  
795 cytokine, CSF3R, a key regulator of neutrophil cell development, proliferation, and  
796 differentiation<sup>98</sup>; in Severe Covid-19 patients, there are increased levels of neutrophils (immune  
797 cells involved in the first-line of defense against pathogens) and changes in their phenotype and  
798 functionality<sup>99</sup>. Also, our hippocampal GRN found that NFKB1 regulates IL-2 (via an enhancer  
799 on chr4:121696658-121696872) and RELA regulates TNFa-induced proteins, TNFAIP3 and  
800 TNFAIP6. Overall, NF-kBs regulate TNF-a, increasing expression during AD progression, likely  
801 triggering neurodegeneration, inflammation, neuronal death, and healthy tissue destruction<sup>23</sup>.

802  
803 RELA regulate genes of several cytokines associated with the severe Covid-19 Cytokine Storm.  
804 For instance, RELA regulates IL-6 and particularly activates IL-12A/B (recruit and activate  
805 Natural Killer cells<sup>100</sup>) and IL-1B via the enhancers. In **Fig. S32**, we shared additional examples  
806 of NFKB1 and RELA TFs regulating other TFs that regulate inflammatory cytokines IL-1B, IL-  
807 12B (recruit and activate Natural Killer cells<sup>100</sup>), CCL2, MMP 1/3, and CLGN. For instance, in the  
808 Hippocampus, NFKB1 regulates TFs SPI1 and BATF, regulating MMP1 (**Fig. S32B**). The  
809 expression of cytokines IL-2, CCL2, IL-1B IL-12B, and TNFa highly positively correlate with AD  
810 severe stages (**Fig. 5E**). IL-2 and TNFa are usually highly expressed in Covid-19 patients with  
811 severe pneumonia who are developing ARDS and need intensive care and oxygen therapy<sup>93</sup>.  
812 NFKB1 and RELA belong to the same Hippocampal gene module.

813  
814 Further, APOE genotype is associated with differences in Complement Cascade Component  
815 C1qrs expression in Covid-19 patients<sup>24</sup> in the DLPFC, as it is negatively correlated with E2/E2  
816 but positively with E4/E4 (**Fig. S33**). C1qrs activates microglia to the M1 state, where they



817 release mediators that increase inflammation and damage healthy cells<sup>101</sup>. We found that  
818 C1qrs is negatively correlated with Control and Initial Stages, but positively correlated with  
819 Moderate and Severe Stages in the Hippocampus (**Fig. S34-35**). Complement activation is  
820 involved in an inflammatory feedback loop with neutrophil activation (resulting in tissue injury)<sup>102</sup>,  
821 and may be a hallmark of severe Covid-19. Many complement components are instead  
822 negatively correlated with Control and Initial Stages in the Hippocampus (except MBL and  
823 VWF), but positively correlated with AD progression. IgG antibodies, whose responses to  
824 various epitopes are key to the immune response to Covid-19<sup>103</sup>, are the only component  
825 positively associated with Moderate AD but not for Severe AD. Fibrinogen and SELP changed  
826 from negative to positive associations from Moderate to Severe AD stages.

827  
828 Additionally, our GRNs help find potential roles of AD SNPs to NFKB for Covid-19. In **Fig. S27**,  
829 we examine the impact of various AD SNPs on the expression of NF-kB TFs and NFKB  
830 regulation of key cytokines described in **Fig. 5D**. We found several SNPs disrupting regulation  
831 of RELA and NFKB1 in the Hippocampus (**Fig. S36**). Moreover, there are 4 highly significant  
832 SNPs ( $p < 5e-15$ ) impacting RELA's ability to regulate ZNF226, a hub TF from the  
833 Hippocampus SNP TF-TF Subnetwork GRN (**Fig. S27B**); RELA also regulates ZNF226's gene  
834 module. 99 extremely significant SNPs ( $p < 1e-9$ ) impact regulation of RELB in DLPFC (**Fig.**  
835 **S37**). In Hippocampal GRN, SNP rs71350303 disrupts RELA regulation of TNFAIP6 (**Fig.**  
836 **S38B**) and in the LTL GRN SNP rs6425995 disrupts NFKB1 regulation of CSF3R (**Fig. S38C**).  
837 Besides the NFKB pathway, we also found several other shared pathways in AD and Covid-19  
838 from KEGG such as IKK, TNFR, PI3K, JNK, and IL6 (**Fig. S39**). We thus looked at the  
839 correlations between AD phenotypes and genes from those pathways in each brain region (**Fig.**  
840 **S40**). Finally, we identified highly correlated AD-COVID pathways and AD phenotypes, e.g.,  
841 TNFR with severe stage and IKK with cognitive impairment in hippocampus, IKK with frequent  
842 plaques in LTL, JNK with Resilience in DLPFC).

843

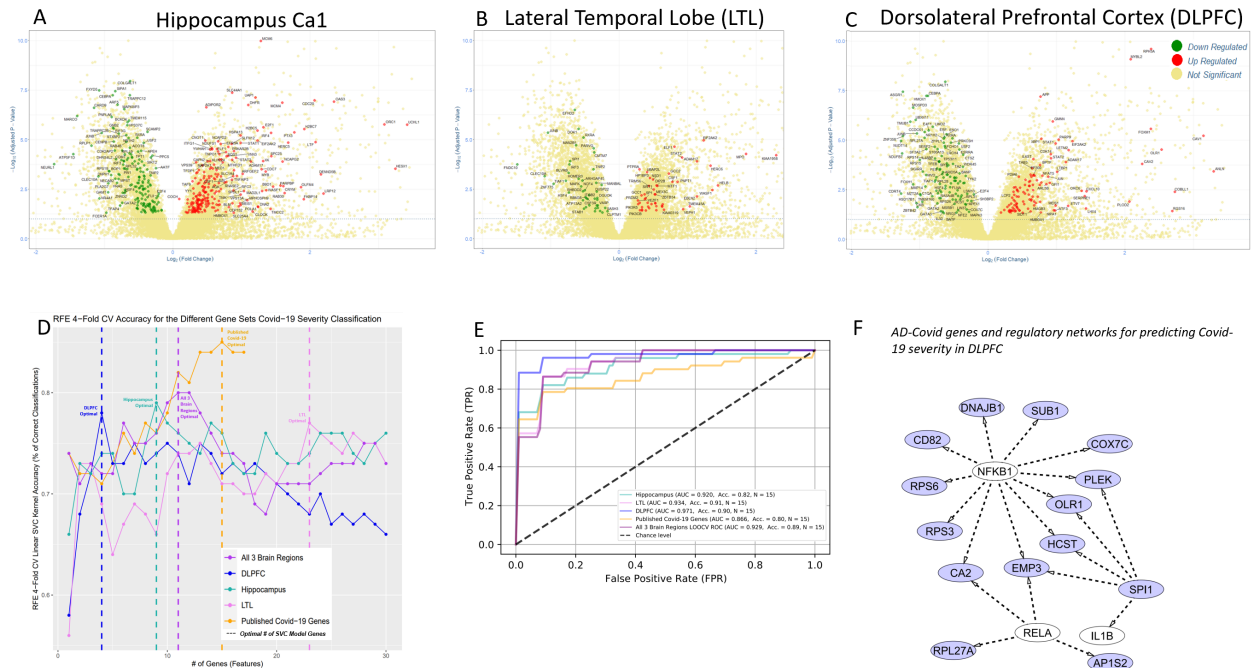

844  
 845 **Fig. 6 – Differential expression and prediction of Covid-19 severity using AD-Covid gene**  
 846 **regulatory networks.** Top volcano plots show differential expression analyses for Covid-19  
 847 severity (i.e., Covid-19 ICU, Methods) and label the genes from the AD-Covid gene regulatory  
 848 networks (GRNs) that relate to 22 AD-Covid genes: **(A)** Hippocampus, **(B)** Lateral Temporal  
 849 Lobe (LTL), **(C)** Dorsolateral Prefrontal Cortex. Red: up-regulated. Green: down-regulated.  
 850 Yellow: No significance. x-axis: log<sub>2</sub>(fold change). y-axis: -log<sub>10</sub>(Adjusted p-value). **(D)**  
 851 Prediction accuracy of Covid-19 severity after selecting different numbers of genes from AD-  
 852 Covid GRNs and recently found Covid-19 genes (benchmark genes). The accuracy was  
 853 calculated based on the support vector machine classification with 4-fold cross-validation. The  
 854 dashed lines correspond to the minimal numbers of select genes with highest accuracy (i.e.,  
 855 optimal gene sets for predicting Covid-19 severity). **(E)** Receiver Operating Characteristic  
 856 (ROC) curves and area under curve (AUC) values for classifying Covid-19 severity in **(D)**. **(F)**  
 857 Subnetwork of DLPFC GRN relating to the 15 DLPFC optimal genes (excluding JUND) for  
 858 predicting Covid-19 severity (N=15) with AD-Covid shared genes. Blue: genes/TFs found in the  
 859 DLPFC final model. White: AD-Covid shared genes.

## 860 Machine learning prediction of Covid-19 severity from AD-Covid gene 861 regulatory networks

862 All gene lists and machine learning prediction results for this section are available in  
 863 **Supplementary file 9**. In total, we found 22 genes from the pathways that are shared between  
 864 Covid-19 and AD in the KEGG database. We also looked at our brain-region gene regulatory  
 865 networks (GRNs) that relate to those AD-Covid genes, including TFs that regulate them as well  
 866 as their target genes, i.e., AD-Covid GRNs. We found 1,305 genes from hippocampus GRN,  
 867 670 genes from LTL GRN, and 895 genes from DLPFC GRN (2,536 unique genes in total, and  
 868 38 genes shared by three regions). As shown in **Fig. S41**, those 38 shared genes (17 found in  
 869 both Covid and AD KEGG Pathways) across AD-Covid GRNs also highly correlate with AD  
 870 phenotypes such as clinical Braak stage.

871

872 We found that many genes from our AD-Covid GRNs are significantly differentially expressed in  
873 the Covid-19 severity condition. Moreover, the Covid-19 positive phenotype is positively  
874 correlated with many of the mechanisms in the AD KEGG pathway (**Fig. S42**). In particular, we  
875 normalized gene expression data (**Fig. S43**) of a recent Covid-19 cohort (N=50 ICU vs. N=50  
876 non-ICU)<sup>108</sup> and identified differentially expressed genes (DEGs) for Covid-19 ICU (Methods).  
877 We found 4,692 DEGs (2,490 up-regulated, 2,202 down-regulated genes) in total. Out of those  
878 DEGs, 403 DEGs are from the AD-Covid GRN in hippocampus (232 up-regulated, 171 down-  
879 regulated, **Fig. 6A**). Similarly, LTL's AD-Covid GRN has 95 DEGs (51 up-regulated, 44 down-  
880 regulated, **Fig. 6B**), and DLPFC's has 223 DEGs (113 up-regulated including APP, 110 down-  
881 regulated, **Fig. 6C**). These DEGs suggest that genes from our AD-Covid GRNs significantly  
882 associate with Covid-19 severity. Thus, beyond association, we further want to develop a model  
883 to predict Covid-19 severity from those genes.

884  
885 In particular, we first gathered 17 benchmark Covid-19 susceptibility genes from recent  
886 studies<sup>54-56</sup>. Then, we used recursive feature elimination (RFE) to select an optimal number of  
887 genes from the list of 17 published Covid-19 genes for Covid-19 severity, i.e., 4-fold cross-  
888 validated feature selection with highest classification accuracy based on linear support vector  
889 machine (Methods, **Fig. 6D**). This resulted in 15 genes being optimal for the published genes  
890 model. Then, we performed RFE feature selection for each region's AD-Covid GRN to select  
891 the top 15 genes; building linear kernel SVM predicted probability models with the same number  
892 of genes (15) from each of the 5 gene lists would enable us to directly compare the  
893 effectiveness of our AD-Covid GRNs with that of the published genes.

894  
895 Our prediction accuracy based on 15 genes for each AD-Covid GRN is also higher than the  
896 optimal benchmark of 15 Covid-19 genes (86% for Hippocampus, 89.99% for DLPFC, 90.99%  
897 for LTL, and 88.99% for combined regions, 80% for the benchmark). As shown in **Fig. 6E**, our  
898 areas under the ROC curve (AUROC) values are also larger than the benchmark (0.912 for  
899 Hippocampus, 0.971 for DLPFC, 0.934 for LTL, 0.929 for combined regions, 0.866 for  
900 benchmark). Relative to the benchmark, the optimal model (in terms of highest accuracy and  
901 highest AUC) improved accuracy by 9.99% and boosted the AUC by 0.105. Therefore, this  
902 suggests that the select genes from our AD-Covid GRNs have higher predictability than existing  
903 Covid-19 genes for predicting Covid-19 severity.

904  
905 We highlight the subnetwork of the DLPFC GRN for 14 out of the 15 optimal predictive genes  
906 (excluding JUND) that are directly regulating or regulated by at least 1 of the 22 shared AD-  
907 Covid genes (**Fig. 6F**). 3 of 22 AD-Covid shared genes (NFKB1, RELA, and IL1B) were found  
908 in this network. Indeed, NFKB1 regulates 11 out of 15 DLPFC model genes (NCOR1, CCR5,  
909 and ERAP1) and RELA regulates 4 genes, further underscoring the importance of NF- $\kappa$ B TFs in  
910 Covid-19 outcomes. Microglia TF SPI1 regulates IL1B along with 4 other DLPFC model genes,  
911 which also supports research into immune dysregulation in both Covid-19 and AD.

912  
913 We also evaluated and compared our predictive models with benchmark genes using Decision  
914 Curve Analysis (DCA). DCA enables evaluating the clinical usability of our Covid-19 severity  
915 prediction models based on their Net Benefits (**Methods**). We plotted the Decision Curves to

916 show how the Net Benefit of each model varies across probability thresholds (**Fig. S44**). And  
917 the threshold of each model that gives the highest Net Benefit corresponds to the optimal  
918 decision probability for sending Covid-19 patients to ICU or not, i.e., the “optimal” threshold (**Fig.**  
919 **S45**). In general, the models of genes from our AD-Covid GRNs have higher Net Benefits than  
920 the benchmark Covid-19 genes, especially around the optimal thresholds that achieve possible  
921 maximum Net Benefits. Note that since 50% of our Covid-19 positive patients are in the ICU, the  
922 maximum Net Benefit is 0.50. The increase in Net Benefit of our models (around 0.00121 to  
923 0.2443 at optimal thresholds with an average increase of 0.119 in Net Benefit) compared with  
924 the benchmark could be interpreted that using the genes from our AD-Covid GRNs on average  
925 increases the number of truly severe Covid-19 patients detected by about 119 per 1000 Covid-  
926 19 positive patients, without changing the number of non-severe patients who are needlessly  
927 sent to the ICU (**Fig. S46**). Thus, those genes along with our predictive models provide potential  
928 novel strategies for helping clinical decisions on sending Covid-19 patients to ICU or not.

## 929 Discussion

930 In this paper, we performed an integrative analysis of multi-omics for predicting the underlying  
931 gene regulatory networks for disease phenotypes that link disease variants to TFs to regulatory  
932 elements to genes and modules. We applied our analysis to the multi-omics datasets of three  
933 AD-relevant brain regions DLPFC, Hippocampus and Lateral Temporal Lobe and predicted  
934 brain regional gene regulatory networks for various AD phenotypes such as progression The  
935 results revealed how potential causal AD risk variants lead to AD phenotypes via gene  
936 regulation. However, our analysis is open-source available and thus can serve as general-  
937 purpose for understanding functional genomics and gene regulation for other diseases.

938  
939 Gene regulation typically fundamentally affects biological and disease functions at the cellular  
940 resolution. Recent sequencing data of single cells such as scRNA-seq and scATAC-seq,  
941 especially in AD and other brain diseases, enable studying the functional genomics and  
942 regulatory mechanisms at the cell type level<sup>104</sup>. For instance, many cell-type gene regulatory  
943 networks in the human brain, such as neuronal and glial types, have been predicted from single  
944 cell data. Shortly, we can perform integrative analysis of those cell-type networks to understand  
945 the regulatory mechanism from AD variants that cause AD for different cell types. Also, many  
946 other phenotypes are observed in AD. Increasing GWAS studies<sup>105</sup> have identified additional  
947 variants associated with refined AD phenotypes such as cerebrospinal fluid and psychotic  
948 symptoms. We aim to predict the gene regulatory networks of those variants for additional AD  
949 phenotypes in future.

950  
951 Also, we found that some regulatory networks in AD also relate to the immunological functions  
952 and pathways for Covid-19. Further, our machine learning and Decision Curve analyses show  
953 that the genes from those AD-Covid regulatory networks better predict Covid-19 severity (i.e.,  
954 ICU) than the known Covid-19 genes. With a dramatic increase of discovered variants for  
955 Covid-19, our integrative analysis will allow us to predict the regulatory mechanisms of the  
956 Covid-19 variants in AD phenotypes. If an exaggerated immune response (found in Covid-19)  
957 can lead to heightened and more severe AD, then perhaps the immune response may indeed

958 be rogue in AD. We can then use Covid-19 as a proxy and biomarker to better understand the  
959 role of a dysregulated immune system in AD onset and progression. This will help advance our  
960 understanding of the interplay between Covid-19, neuroimmune and AD phenotypes.

961  
962 Furthermore, we integrated the data from different population studies via step by step. Many  
963 large scientific consortia have generated matched multi-omic data of individuals such as  
964 PsychENCODE<sup>35</sup>, AMP-AD<sup>106</sup>, TCGA<sup>107</sup>. Moreover, machine learning has been widely used for  
965 predicting phenotypes from individual data. Thus, we can extend our analysis to input matched  
966 omics data of individuals (e.g., genotype, gene expression, epigenomics) at the population level  
967 to train machine learning models to predict personalized phenotypes. The resulting predictive  
968 models can be further used to predict personalized phenotypes for new individual data and  
969 prioritize phenotype-specific functional genomics and gene regulatory networks in human  
970 diseases.

## 971 Supplementary Information

972 Supplementary file 1 – Genes, modules, phenotypes, enrichments, and Transcription Factors  
973 regulating gene modules for Hippocampus Ca1

974 Supplementary file 2 – Genes, modules, phenotypes, and enrichments and Transcription  
975 Factors regulating gene modules for Lateral Temporal Lobe (LTL)

976 Supplementary file 3 – Genes, modules, phenotypes, and enrichments for the Dorsolateral  
977 Prefrontal Cortex (DLPFC)

978 Supplementary file 4 – Gene Regulatory Network (GRN) for the Hippocampus Ca1

979 Supplementary file 5 – Gene Regulatory Network for the Lateral Temporal Lobe (LTL)

980 Supplementary file 6 – SNPs Interrupting Transcription Factor Binding Sites (TFBS) in  
981 Hippocampus Ca1 Gene Regulatory Network (GRN)

982 Supplementary file 7 – SNPs Interrupting Transcription Factor Binding Sites (TFBS) in Lateral  
983 Temporal Lobe (LTL) Gene Regulatory Network (GRN)

984 Supplementary file 8 – SNPs Interrupting Transcription Factor Binding Sites (TFBS) in DLPFC  
985 Gene Regulatory Network (GRN)

986 Supplementary file 9 – shared AD and Covid-19 genes, 5 initial gene lists (for Hippocampus  
987 Ca1, Lateral Temporal Lobe (LTL), Dorsolateral Prefrontal Cortex (DLPFC), All 3 combined,  
988 Published Covid-19 genes), final SVC linear kernel genes for 5 models, predicted probabilities  
989 from each model, and Decision Curve Analysis (Net Benefit of each model for various  
990 probability thresholds).

991 Supplementary document – Supplementary Figures S1 to S46 and Supplementary Tables S1 to  
992 S3.

## 993 Acknowledgements

994 The authors are grateful to Jonathan Edward Bryan for his assistance in tasks related to this  
995 project and Renu Khullar for her helpful comments on the manuscript.

996

## 997 Funding

998 This work was supported by the grants of National Institutes of Health, R01AG067025,  
999 R21CA237955 and U01MH116492 to Daifeng Wang and U54HD090256 to Waisman Center.  
1000 Saniya Khullar was also supported by an NLM training grant to the Computation and Informatics  
1001 in Biology and Medicine Training Program (NLM 5T15LM007359).

## 1002 Conflict of Interest

1003 None declared.

1004

## 1005 Contributions

1006 D.W. conceived and designed the study. S.K. and D.W. analyzed the data and wrote the  
1007 manuscript. All authors read and approved the final manuscript.

## 1008 References

- 1009 1. Alzheimer's Statistics. *Alzheimers.net* <https://www.alzheimers.net/resources/alzheimers->  
1010 [statistics](https://www.alzheimers.net/resources/alzheimers-statistics).
- 1011 2. Rabinovici, G. D. Late-onset Alzheimer Disease. *Contin. Lifelong Learn. Neurol.* **25**, 14–33  
1012 (2019).
- 1013 3. Heneka, M. T. *et al.* Neuroinflammation in Alzheimer's Disease. *Lancet Neurol.* **14**, 388–  
1014 405 (2015).
- 1015 4. CA1 neurons in the human hippocampus are critical for autobiographical memory, mental  
1016 time travel, and auto-noetic consciousness | PNAS.  
1017 <https://www.pnas.org/content/108/42/17562>.
- 1018 5. Goldstein, I. S., Erickson, D. J., Sleeper, L. A., Haynes, R. L. & Kinney, H. C. The Lateral  
1019 Temporal Lobe in Early Human Life. *J. Neuropathol. Exp. Neurol.* **76**, 424–438 (2017).
- 1020 6. Nativio, R. *et al.* An integrated multi-omics approach identifies epigenetic alterations  
1021 associated with Alzheimer's disease. *Nat. Genet.* **52**, 1024–1035 (2020).
- 1022 7. Emotional Dysfunction in Psychopathology and Neuropathology: Neural and Genetic  
1023 Pathways - ScienceDirect.  
1024 <https://www.sciencedirect.com/science/article/pii/B9780128001059000226>.

- 1025 8. Brinton, R. D., Gore, A. C., Schmidt, P. J. & Morrison, J. H. 68 - Reproductive Aging of  
1026 Females: Neural Systems. in *Hormones, Brain and Behavior (Second Edition)* (eds. Pfaff,  
1027 D. W., Arnold, A. P., Etgen, A. M., Fahrbach, S. E. & Rubin, R. T.) 2199–2224 (Academic  
1028 Press, 2009). doi:10.1016/B978-008088783-8.00068-1.
- 1029 9. Kumar, S. *et al.* Dorsolateral prefrontal cortex metabolites and their relationship with  
1030 plasticity in Alzheimer's disease. *Alzheimers Dement.* **16**, e045879 (2020).
- 1031 10. Marques-Coelho, D. *et al.* Differential transcript usage unravels gene expression  
1032 alterations in Alzheimer's disease human brains. *Npj Aging Mech. Dis.* **7**, 1–15 (2021).
- 1033 11. Morabito, S., Miyoshi, E., Michael, N. & Swarup, V. Integrative genomics approach  
1034 identifies conserved transcriptomic networks in Alzheimer's disease. *Hum. Mol. Genet.* **29**,  
1035 2899–2919 (2020).
- 1036 12. Co-expression modules construction by WGCNA and identify potential prognostic markers  
1037 of uveal melanoma - ScienceDirect.  
1038 <https://www.sciencedirect.com/science/article/abs/pii/S0014483517303536?via%3Dihub>.
- 1039 13. Liang, J.-W. *et al.* Application of Weighted Gene Co-Expression Network Analysis to  
1040 Explore the Key Genes in Alzheimer's Disease. *J. Alzheimers Dis.* **65**, 1353–1364.
- 1041 14. Neff, R. A. *et al.* Molecular subtyping of Alzheimer's disease using RNA sequencing data  
1042 reveals novel mechanisms and targets. *Sci. Adv.* **7**, eabb5398 (2021).
- 1043 15. Jansen, I. E. *et al.* Genome-wide meta-analysis identifies new loci and functional pathways  
1044 influencing Alzheimer's disease risk. *Nat. Genet.* **51**, 404–413 (2019).
- 1045 16. Novikova, G. *et al.* Integration of Alzheimer's disease genetics and myeloid genomics  
1046 identifies disease risk regulatory elements and genes. *Nat. Commun.* **12**, 1610 (2021).
- 1047 17. Wingo, A. P. *et al.* Integrating human brain proteomes with genome-wide association data  
1048 implicates new proteins in Alzheimer's disease pathogenesis. *Nat. Genet.* **53**, 143–146  
1049 (2021).

- 1050 18. Kumar, S., Ambrosini, G. & Bucher, P. SNP2TFBS – a database of regulatory SNPs  
1051 affecting predicted transcription factor binding site affinity. *Nucleic Acids Res.* **45**, D139–  
1052 D144 (2017).
- 1053 19. Ch, Zuo, ler, Shin, S. & Keles, S. *atSNP: Affinity test for identifying regulatory SNPs.*  
1054 (Bioconductor version: Release (3.12), 2021). doi:10.18129/B9.bioc.atSNP.
- 1055 20. Huo, Y., Li, S., Liu, J., Li, X. & Luo, X.-J. Functional genomics reveal gene regulatory  
1056 mechanisms underlying schizophrenia risk. *Nat. Commun.* **10**, 670 (2019).
- 1057 21. Naughton, S. X., Raval, U. & Pasinetti, G. M. Potential Novel Role of COVID-19 in  
1058 Alzheimer’s Disease and Preventative Mitigation Strategies. *J. Alzheimers Dis. JAD* **76**,  
1059 21–25 (2020).
- 1060 22. Neurological Manifestations of COVID-19 Feature T Cell Exhaustion and Dedifferentiated  
1061 Monocytes in Cerebrospinal Fluid: Immunity. [https://www.cell.com/immunity/fulltext/S1074-](https://www.cell.com/immunity/fulltext/S1074-7613(20)30539-2?_returnURL=https%3A%2F%2Flinkinghub.elsevier.com%2Fretrieve%2Fpii%2FS1074761320305392%3Fshowall%3Dtrue)  
1062 [7613\(20\)30539-](https://www.cell.com/immunity/fulltext/S1074-7613(20)30539-2?_returnURL=https%3A%2F%2Flinkinghub.elsevier.com%2Fretrieve%2Fpii%2FS1074761320305392%3Fshowall%3Dtrue)  
1063 [2?\\_returnURL=https%3A%2F%2Flinkinghub.elsevier.com%2Fretrieve%2Fpii%2FS107476](https://www.cell.com/immunity/fulltext/S1074-7613(20)30539-2?_returnURL=https%3A%2F%2Flinkinghub.elsevier.com%2Fretrieve%2Fpii%2FS1074761320305392%3Fshowall%3Dtrue)  
1064 [1320305392%3Fshowall%3Dtrue](https://www.cell.com/immunity/fulltext/S1074-7613(20)30539-2?_returnURL=https%3A%2F%2Flinkinghub.elsevier.com%2Fretrieve%2Fpii%2FS1074761320305392%3Fshowall%3Dtrue).
- 1065 23. Landhuis, E. Could the immune system be key to Alzheimer’s disease? *Knowable Mag.*  
1066 *Annu. Rev.* (2021) doi:10.1146/knowable-012921-3.
- 1067 24. Inal, J. Biological Factors Linking ApoE  $\epsilon$ 4 Variant and Severe COVID-19. *Curr.*  
1068 *Atheroscler. Rep.* **22**, (2020).
- 1069 25. Blalock, E. M. *et al.* Incipient Alzheimer’s disease: Microarray correlation analyses reveal  
1070 major transcriptional and tumor suppressor responses. *Proc. Natl. Acad. Sci.* **101**, 2173–  
1071 2178 (2004).
- 1072 26. mail.nih.gov>, S. D. <sdavis2 at. *GEOquery: Get data from NCBI Gene Expression*  
1073 *Omnibus (GEO).* (Bioconductor version: Release (3.12), 2021).  
1074 doi:10.18129/B9.bioc.GEOquery.
- 1075 27. hgu133a.db. *Bioconductor* <http://bioconductor.org/packages/hgu133a.db/>.



- 1076 28. hgu133acdf. *Bioconductor* <http://bioconductor.org/packages/hgu133acdf/>.
- 1077 29. ds.harvard.edu>, R. A. I. <rafa at et al. *affy: Methods for Affymetrix Oligonucleotide Arrays*.  
1078 (Bioconductor version: Release (3.12), 2021). doi:10.18129/B9.bioc.affy.
- 1079 30. RMA normalization for microarray data. [https://felixfan.github.io/RMA-Normalization-](https://felixfan.github.io/RMA-Normalization-Microarray/)  
1080 [Microarray/](https://felixfan.github.io/RMA-Normalization-Microarray/).
- 1081 31. The Religious Orders Study and Memory and Aging Project (ROSMAP) Study.  
1082 <https://adknowledgeportal.synapse.org/Explore/Studies/DetailsPage?Study=syn3219045>.
- 1083 32. An atlas of chromatin accessibility in the adult human brain.  
1084 <https://bendlj01.u.hpc.mssm.edu/multireg/>.
- 1085 33. Jung, I. et al. A compendium of promoter-centered long-range chromatin interactions in the  
1086 human genome. *Nat. Genet.* **51**, 1442–1449 (2019).
- 1087 34. TxDb.Hsapiens.UCSC.hg19.knownGene. *Bioconductor*  
1088 <http://bioconductor.org/packages/TxDb.Hsapiens.UCSC.hg19.knownGene/>.
- 1089 35. Resource.PsychEncode. <http://resource.psychencode.org/>.
- 1090 36. Langfelder, P. & Horvath, S. WGCNA: an R package for weighted correlation network  
1091 analysis. *BMC Bioinformatics* **9**, 559 (2008).
- 1092 37. Botía, J. A. et al. An additional k-means clustering step improves the biological features of  
1093 WGCNA gene co-expression networks. *BMC Syst. Biol.* **11**, 47 (2017).
- 1094 38. Safieh, M., Korczyn, A. D. & Michaelson, D. M. ApoE4: an emerging therapeutic target for  
1095 Alzheimer’s disease. *BMC Med.* **17**, 64 (2019).
- 1096 39. Jin, T. et al. scGRNom: a computational pipeline of integrative multi-omics analyses for  
1097 predicting cell-type disease genes and regulatory networks. *Genome Med.* **13**, 95 (2021).
- 1098 40. Tan, G. *TFBSTools: Software Package for Transcription Factor Binding Site (TFBS)*  
1099 *Analysis*. (Bioconductor version: Release (3.12), 2021). doi:10.18129/B9.bioc.TFBSTools.
- 1100 41. Schep, A. & University, S. *motifmatchr: Fast Motif Matching in R*. (Bioconductor version:  
1101 Release (3.12), 2021). doi:10.18129/B9.bioc.motifmatchr.

- 1102 42. Groeneveld, C. *et al.* *RTN: RTN: Reconstruction of Transcriptional regulatory Networks*  
1103 *and analysis of regulons.* (Bioconductor version: Release (3.12), 2021).  
1104 doi:10.18129/B9.bioc.RTN.
- 1105 43. systemsbiology.org>, S. A. <seth.ament at, systemsbiology.org>, P. S. <pshannon at &  
1106 systemsbiology.org>, M. R. <mrichard at. *trena: Fit transcriptional regulatory networks*  
1107 *using gene expression, priors, machine learning.* (Bioconductor version: Release (3.12),  
1108 2021). doi:10.18129/B9.bioc.trena.
- 1109 44. Huynh-Thu, V. A., Aibar, S. & Geurts, P. *GENIE3: GENE Network Inference with Ensemble*  
1110 *of trees.* (Bioconductor version: Release (3.12), 2021). doi:10.18129/B9.bioc.GENIE3.
- 1111 45. The Human Transcription Factors: Cell. [https://www.cell.com/cell/fulltext/S0092-](https://www.cell.com/cell/fulltext/S0092-8674(18)30106-5?_returnURL=https%3A%2F%2Flinkinghub.elsevier.com%2Fretrieve%2Fpii%2FS0092867418301065%3Fshowall%3Dtrue)  
1112 [8674\(18\)30106-](https://www.cell.com/cell/fulltext/S0092-8674(18)30106-5?_returnURL=https%3A%2F%2Flinkinghub.elsevier.com%2Fretrieve%2Fpii%2FS0092867418301065%3Fshowall%3Dtrue)  
1113 [5?\\_returnURL=https%3A%2F%2Flinkinghub.elsevier.com%2Fretrieve%2Fpii%2FS009286](https://www.cell.com/cell/fulltext/S0092-8674(18)30106-5?_returnURL=https%3A%2F%2Flinkinghub.elsevier.com%2Fretrieve%2Fpii%2FS0092867418301065%3Fshowall%3Dtrue)  
1114 [7418301065%3Fshowall%3Dtrue](https://www.cell.com/cell/fulltext/S0092-8674(18)30106-5?_returnURL=https%3A%2F%2Flinkinghub.elsevier.com%2Fretrieve%2Fpii%2FS0092867418301065%3Fshowall%3Dtrue).
- 1115 46. JASPAR 2020: An open-access database of transcription factor binding profiles.  
1116 <http://jaspar.genereg.net>.
- 1117 47. Margolin, A. A. *et al.* ARACNE: An Algorithm for the Reconstruction of Gene Regulatory  
1118 Networks in a Mammalian Cellular Context. *BMC Bioinformatics* **7**, S7 (2006).
- 1119 48. Comprehensive functional genomic resource and integrative model for the human brain |  
1120 Science. <https://science.sciencemag.org/content/362/6420/eaat8464>.
- 1121 49. Coetzee, S. G. & Hazelett, D. J. *motifbreakR: A Package For Predicting The*  
1122 *Disruptiveness Of Single Nucleotide Polymorphisms On Transcription Factor Binding Sites.*  
1123 (Bioconductor version: Release (3.12), 2021). doi:10.18129/B9.bioc.motifbreakR.
- 1124 50. KEGG PATHWAY Database. <https://www.genome.jp/kegg/pathway.html>.
- 1125 51. Luo, W. *pathview: a tool set for pathway based data integration and visualization.*  
1126 (Bioconductor version: Release (3.12), 2021). doi:10.18129/B9.bioc.pathview.

- 1127 52. Overmyer, K. A. *et al.* Large-Scale Multi-omic Analysis of COVID-19 Severity. *Cell Syst.*  
1128 **12**, 23-40.e7 (2021).
- 1129 53. Love, M., Ahlmann-Eltze, C., Forbes, K., Anders, S. & Huber, W. *DESeq2: Differential*  
1130 *gene expression analysis based on the negative binomial distribution.* (Bioconductor  
1131 version: Release (3.12), 2021). doi:10.18129/B9.bioc.DESeq2.
- 1132 54. Hu, J., Li, C., Wang, S., Li, T. & Zhang, H. Genetic variants are identified to increase risk of  
1133 COVID-19 related mortality from UK Biobank data. *Hum. Genomics* **15**, 10 (2021).
- 1134 55. Genetic mechanisms of critical illness in COVID-19 | Nature.  
1135 <https://www.nature.com/articles/s41586-020-03065-y#citeas>.
- 1136 56. New insights into genetic susceptibility of COVID-19: an ACE2 and TMPRSS2  
1137 polymorphism analysis | BMC Medicine | Full Text.  
1138 <https://bmcmmedicine.biomedcentral.com/articles/10.1186/s12916-020-01673-z#citeas>.
- 1139 57. scikit-learn: machine learning in Python — scikit-learn 0.24.1 documentation. [https://scikit-](https://scikit-learn.org/stable/)  
1140 [learn.org/stable/](https://scikit-learn.org/stable/).
- 1141 58. sklearn.svm.SVC — scikit-learn 0.24.1 documentation. [https://scikit-](https://scikit-learn.org/stable/modules/generated/sklearn.svm.SVC.html)  
1142 [learn.org/stable/modules/generated/sklearn.svm.SVC.html](https://scikit-learn.org/stable/modules/generated/sklearn.svm.SVC.html).
- 1143 59. Vickers, A. J. & Elkin, E. B. Decision Curve Analysis: A Novel Method for Evaluating  
1144 Prediction Models. *Med. Decis. Making* **26**, 565–574 (2006).
- 1145 60. Biostatistics: Decision Curve Analysis | Memorial Sloan Kettering Cancer Center.  
1146 [https://www.mskcc.org/departments/epidemiology-biostatistics/biostatistics/decision-curve-](https://www.mskcc.org/departments/epidemiology-biostatistics/biostatistics/decision-curve-analysis)  
1147 [analysis](https://www.mskcc.org/departments/epidemiology-biostatistics/biostatistics/decision-curve-analysis).
- 1148 61. Bezprozvanny, I. & Mattson, M. P. Neuronal calcium mishandling and the pathogenesis of  
1149 Alzheimer’s disease. *Trends Neurosci.* **31**, 454–463 (2008).
- 1150 62. Rohilla, K. J. & Gagnon, K. T. RNA biology of disease-associated microsatellite repeat  
1151 expansions. *Acta Neuropathol. Commun.* **5**, (2017).

- 1152 63. Lee, J. K. & Kim, N.-J. Recent Advances in the Inhibition of p38 MAPK as a Potential  
1153 Strategy for the Treatment of Alzheimer's Disease. *Mol. J. Synth. Chem. Nat. Prod. Chem.*  
1154 **22**, (2017).
- 1155 64. Nuclear factor-kappa  $\beta$  as a therapeutic target for Alzheimer's disease - Jha - 2019 -  
1156 Journal of Neurochemistry - Wiley Online Library.  
1157 <https://onlinelibrary.wiley.com/doi/10.1111/jnc.14687>.
- 1158 65. Pei, J. *et al.* Excessive Activation of TLR4/NF- $\kappa$ B Interactively Suppresses the Canonical  
1159 Wnt/ $\beta$ -catenin Pathway and Induces SANFH in SD Rats. *Sci. Rep.* **7**, 11928 (2017).
- 1160 66. JCI - Type I interferon response drives neuroinflammation and synapse loss in Alzheimer  
1161 disease. <https://www.jci.org/articles/view/133737>.
- 1162 67. Metabolic correlates of prevalent mild cognitive impairment and Alzheimer's disease in  
1163 adults with Down syndrome - Mapstone - 2020 - Alzheimer's & Dementia: Diagnosis,  
1164 Assessment & Disease Monitoring - Wiley Online Library. [https://alz-](https://alz-journals.onlinelibrary.wiley.com/doi/full/10.1002/dad2.12028)  
1165 [journals.onlinelibrary.wiley.com/doi/full/10.1002/dad2.12028](https://alz-journals.onlinelibrary.wiley.com/doi/full/10.1002/dad2.12028).
- 1166 68. Wnt signaling in the nervous system and in Alzheimer's disease | Journal of Molecular Cell  
1167 Biology | Oxford Academic. <https://academic.oup.com/jmcb/article/6/1/64/874321>.
- 1168 69. Neurodegeneration and microtubule dynamics: death by a thousand cuts.  
1169 <https://www.ncbi.nlm.nih.gov/pmc/articles/PMC4563776/>.
- 1170 70. Vasile, F., Dossi, E. & Rouach, N. Human astrocytes: structure and functions in the healthy  
1171 brain. *Brain Struct. Funct.* **222**, 2017–2029 (2017).
- 1172 71. Prion protein and Alzheimer disease.  
1173 <https://www.ncbi.nlm.nih.gov/pmc/articles/PMC2807690/>.
- 1174 72. Esposito, M. & Sherr, G. L. Epigenetic Modifications in Alzheimer's Neuropathology and  
1175 Therapeutics. *Front. Neurosci.* **13**, (2019).

- 1176 73. Frontiers | Microglia in Alzheimer Disease: Well-Known Targets and New Opportunities |  
1177 Frontiers in Aging Neuroscience.  
1178 <https://www.frontiersin.org/articles/10.3389/fnagi.2019.00233/full>.
- 1179 74. Frontiers | Therapeutic Inhibition of the Complement System in Diseases of the Central  
1180 Nervous System | Immunology.  
1181 <https://www.frontiersin.org/articles/10.3389/fimmu.2019.00362/full>.
- 1182 75. Keshavan, M., Lizano, P. & Prasad, K. The synaptic pruning hypothesis of schizophrenia:  
1183 promises and challenges. *World Psychiatry* **19**, 110–111 (2020).
- 1184 76. Navarro, V. *et al.* Microglia in Alzheimer’s Disease: Activated, Dysfunctional or  
1185 Degenerative. *Front. Aging Neurosci.* **10**, (2018).
- 1186 77. Ebanks, B., Ingram, T. L. & Chakrabarti, L. ATP synthase and Alzheimer’s disease: putting  
1187 a spin on the mitochondrial hypothesis. *Aging* **12**, 16647–16662 (2020).
- 1188 78. Costarelli, L., Malavolta, M., Giacconi, R. & Provinciali, M. Dysfunctional macrophages in  
1189 Alzheimer Disease: another piece of the “macroph-aging” puzzle? *Aging* **9**, 1865–1866  
1190 (2017).
- 1191 79. Du, Y. *et al.* MKP-1 reduces A $\beta$  generation and alleviates cognitive impairments in  
1192 Alzheimer’s disease models. *Signal Transduct. Target. Ther.* **4**, 1–12 (2019).
- 1193 80. Ki-1 Antigen | Colorado PROFILES. <https://profiles.ucdenver.edu/display/218590>.
- 1194 81. Cho, S.-J., Park, M. H., Han, C., Yoon, K. & Koh, Y. H. VEGFR2 alteration in Alzheimer’s  
1195 disease. *Sci. Rep.* **7**, 17713 (2017).
- 1196 82. Complement C3 Deficiency Leads to Accelerated Amyloid  $\beta$  Plaque Deposition and  
1197 Neurodegeneration and Modulation of the Microglia/Macrophage Phenotype in Amyloid  
1198 Precursor Protein Transgenic Mice | Journal of Neuroscience.  
1199 <https://www.jneurosci.org/content/28/25/6333>.
- 1200 83. Quintela-López, T. *et al.* A $\beta$  oligomers promote oligodendrocyte differentiation and  
1201 maturation via integrin  $\beta$ 1 and Fyn kinase signaling. *Cell Death Dis.* **10**, 1–16 (2019).

- 1202 84. Lu, T. *et al.* REST and stress resistance in ageing and Alzheimer's disease. *Nature* **507**,  
1203 448–454 (2014).
- 1204 85. Maezawa, I., Jenkins, D. P., Jin, B. E. & Wulff, H. Microglial KCa3.1 Channels as a  
1205 Potential Therapeutic Target for Alzheimer's Disease. *Int. J. Alzheimers Dis.* **2012**, (2012).
- 1206 86. Magno, L. *et al.* Alzheimer's disease phospholipase C-gamma-2 (PLCG2) protective  
1207 variant is a functional hypermorph. *Alzheimers Res. Ther.* **11**, 16 (2019).
- 1208 87. Liu, N. *et al.* Hippocampal transcriptome-wide association study and neurobiological  
1209 pathway analysis for Alzheimer's disease. *PLOS Genet.* **17**, e1009363 (2021).
- 1210 88. Yashiro, T. *et al.* A transcription factor PU.1 is critical for Ccl22 gene expression in  
1211 dendritic cells and macrophages. *Sci. Rep.* **9**, 1161 (2019).
- 1212 89. PU.1 regulates Alzheimer's disease-associated genes in primary human microglia |  
1213 Molecular Neurodegeneration | Full Text.  
1214 [https://molecularneurodegeneration.biomedcentral.com/articles/10.1186/s13024-018-0277-](https://molecularneurodegeneration.biomedcentral.com/articles/10.1186/s13024-018-0277-1)  
1215 [1.](https://molecularneurodegeneration.biomedcentral.com/articles/10.1186/s13024-018-0277-1)
- 1216 90. Early induction of c-Myc is associated with neuronal cell death - ScienceDirect.  
1217 <https://www.sciencedirect.com/science/article/abs/pii/S0304394011013899>.
- 1218 91. Sáez, M. E. *et al.* Genome Wide Meta-Analysis identifies common genetic signatures  
1219 shared by heart function and Alzheimer's disease. *Sci. Rep.* **9**, 16665 (2019).
- 1220 92. Yi, M. *et al.* The potassium channel KCa3.1 constitutes a pharmacological target for  
1221 astrogliosis associated with ischemia stroke. *J. Neuroinflammation* **14**, (2017).
- 1222 93. Kircheis, R. *et al.* NF-κB Pathway as a Potential Target for Treatment of Critical Stage  
1223 COVID-19 Patients. *Front. Immunol.* **11**, (2020).
- 1224 94. steve. What is NF-κB pathway? *MBInfo* [https://www.mechanobio.info/what-is-](https://www.mechanobio.info/what-is-mechanosignaling/signaling-pathways/what-is-the-nf-%ce%bab-pathway/)  
1225 [mechanosignaling/signaling-pathways/what-is-the-nf-%ce%bab-pathway/](https://www.mechanobio.info/what-is-mechanosignaling/signaling-pathways/what-is-the-nf-%ce%bab-pathway/).
- 1226 95. Kwee, T. C. & Kwee, R. M. Chest CT in COVID-19: What the Radiologist Needs to  
1227 Know. *RadioGraphics* **40**, 1848–1865 (2020).

- 1228 96. Targeting transcriptional regulation of SARS-CoV-2 entry factors ACE2 and TMPRSS2 |  
1229 PNAS. <https://www.pnas.org/content/118/1/e2021450118>.
- 1230 97. Liu, M. *et al.* CXCL10/IP-10 in infectious diseases pathogenesis and potential therapeutic  
1231 implications. *Cytokine Growth Factor Rev.* **22**, 121–130 (2011).
- 1232 98. Lance, A. *et al.* Altered expression of CSF3R splice variants impacts signal response and  
1233 is associated with SRSF2 mutations. *Leukemia* **34**, 369–379 (2020).
- 1234 99. Frontiers | Neutrophils in COVID-19 | Immunology.  
1235 <https://www.frontiersin.org/articles/10.3389/fimmu.2021.652470/full>.
- 1236 100. Parham, P. *The Immune System*. (Garland Science, 2014).
- 1237 101. Hammad, A., Westacott, L. & Zaben, M. The role of the complement system in traumatic  
1238 brain injury: a review. *J. Neuroinflammation* **15**, (2018).
- 1239 102. Java, A. *et al.* The complement system in COVID-19: friend and foe? *JCI Insight* **5**,.
- 1240 103. Heffron, A. S. *et al.* The landscape of antibody binding in SARS-CoV-2 infection. *bioRxiv*  
1241 2020.10.10.334292 (2021) doi:10.1101/2020.10.10.334292.
- 1242 104. Jiang, J., Wang, C., Qi, R., Fu, H. & Ma, Q. scREAD: A Single-Cell RNA-Seq Database for  
1243 Alzheimer's Disease. *iScience* **23**, 101769 (2020).
- 1244 105. GWAS Catalog. <https://www.ebi.ac.uk/gwas/search?query=Alzheimer%27s%20disease>.
- 1245 106. AD Knowledge Portal -. <https://adknowledgeportal.synapse.org/>.
- 1246 107. The Cancer Genome Atlas Program - National Cancer Institute.  
1247 <https://www.cancer.gov/about-nci/organization/ccg/research/structural-genomics/tcga>  
1248 (2018).
- 1249
